# Supplementary material for: Integrating Bioinformatics Tools to Handle Glycosylation
Source: PubMed Central journal article supplement (PMC3248387; doi:10.1371/journal.pcbi.1002285), 2011-12-29
Supplement: pcbi.1002285.s002.pdf [file pcbi.1002285.s002.pdf]

Conservation: 001000001154378656011111264549967443528288397847403311012043978645  
SS

| TARGET                    | IA                        | IB                           | IC                          |               |
|---------------------------|---------------------------|------------------------------|-----------------------------|---------------|
| S-VDKVKQIHRGTGYHFQPP----- | KNWIND                    | PNGPLYKGLYHLFYQYNPKGA--      | WVGNIVWAHVS                 |               |
| LANQQIEQPYRTGYHFQPP-----  | SNWMND                    | PNGPMLYQGVYHFFYQYNPYAAT-FGDV | IWGHAVS                     |               |
| Q93X60                    | KS-PSVNQPYRTGFHFQPP-----  | KNWMND                       | PNGPMLYKGIYHLFYQWNPNGA--    | WVGNIVWAHSTS  |
| Q43866                    | PWNSMLSWQRTAFHFQPE-----   | KNWMND                       | PNGPLFYKGYHFFYQWNPNGA--     | WVGDIVWGHAVS  |
| A0A7Z0                    | PWSNAMLQWQRTGFHFQPE-----  | QHYMND                       | PNGPVYGGWYHLFYQHNPNGD--     | SWGNIWAHVS    |
| A3QRG0                    | S---EDLQPYRTAFHFQPL-----  | KNWMND                       | PNGPMYFNGVYHLFYQYNPGGP--    | IWGNISWGHVS   |
| A5GXL9                    | SP---SQTYSYHFQPP-----     | KNWMND                       | PNGPTVYRGLYHLFYQYNPLGP--    | DWGNIVWAHSTS  |
| A7IZK7                    | PWTNAMLQWQRTGFHFQPE-----  | KNWMND                       | PNGPLFHMGWYHLFYQYNPDSA--    | IWGNITWGHAVS  |
| A7IZK8                    | PFTTKMLQWQRTGFHFQPP-----  | RYFMSD                       | PSGPVYKGVYHFFYQHNAKAA--     | FWGNIAWGHAS   |
| A7LJR5                    | PWTNDMLRWQRTGFHFQPE-----  | KNFQAD                       | PNAAMFYKGYHFFYQYNPTGV--     | AWDYTIWGHAVS  |
| A7RDD3                    | ---PLASTQFRTAYHFQPT-----  | HYWMND                       | PNAPMYDGVYHLFYQYNPNGA--     | TWTAYMSWGHVS  |
| A9CZQ1                    | ---FIASELYRTAYHFQPT-----  | QHWMDN                       | PNAPMYNGVYHLFYQHNPDA--      | TWTANISWGHVS  |
| A9E2W4                    | LPTQIEQPYRTGYHFQPP-----   | SNWMND                       | PNGPMLYNGVYHFFYQYNPYAA--    | TFGDVIVWGHAVS |
| A9JIF3                    | AWSNAMLQWQRTAYHFQPP-----  | KNWMND                       | PNGPLYHKGWYHLFYQYNPDSA--    | IWGNITWGHAVS  |
| A9LST6                    | LESNAEVEWERSAYHFQPD-----  | KNFISD                       | PDGPMYHMGWYHLFYQYNPESA--    | IWGNITWGHVS   |
| A9YTS8                    | YSQSDRLTWERTAYHFQPP-----  | KNFIYD                       | PNGPLFHMGWYHLFYQYNPYAP--    | IWGNMSWGHAVT  |
| A9YTS9                    | PWSNAMLQWQRTGFHFQPL-----  | KHYMND                       | PNGPVYGGWYHLFYQHNPYGD--     | SWANISWGHAVS  |
| B0I1Q7                    | BNINAMFSWQRTAFHFQPE-----  | KNWIND                       | PNGPLFHKGWYHLFYQYNPDSA--    | IWGNITWGHAVS  |
| B2NIA0                    | PWTNKMLSWQRTGFHFQPE-----  | KNWMND                       | PNGPLYKGYHFFYQYNPNAA--      | WVGDIAWGHAVS  |
| 004372                    | LKTNAEVEWQRSAYHFQPD-----  | KNYISD                       | PDGPMYHMGWYHLFYQYNPESA--    | IWGNITWGHVS   |
| 023786                    | LESNADVEWQRSAYHFQPD-----  | KNFISD                       | PDGPMYHMGWYHLFYQYNPESA--    | IWGNITWGHVS   |
| 024459                    | PWSNAMLQWQRTGFHFQPP-----  | KNWMND                       | PNGPVYKGVYHLFYQYNPDGA--     | IWGNKIAGHAVS  |
| 065341                    | PWSNAMLQWQRTGFHFQPP-----  | KNWMND                       | PNGPVYKGVYHLFYQYNPDGA--     | IWGNKIAGHAVS  |
| 065342                    | PSAADRLRWERTAFHFQPA-----  | KNFIYD                       | PNGPLFHMGWYHLFYQYNPYAP--    | FWGNMTWGHAVS  |
| 065778                    | PWTNEMLKWQRTGYHFQPP-----  | NHFMSD                       | PNAAMYKGYHFFYQYNPNGS--      | AWDYSISWGHAVS |
| 081082                    | PWTNQMLSWQRTGFHFQPP-----  | KNWMND                       | PNGPLYKGYHFFYQYNPEGA--      | IWGNITWGHAVS  |
| 081083                    | E-ATEVDKELRTGYHFQPP-----  | KHWIND                       | PNGPMYKGLYHLFYQYNPKGA--     | WVGNIIWAHVS   |
| 081118                    | YSQTDRLSWERTAFHFQPA-----  | KNFIYD                       | PDGQLFHMGWYHMFYQYNPYAP--    | WVGNMSWGHVS   |
| 081985                    | LDSSAEVEWQRSTYHFQPD-----  | KNFISD                       | PDGPMYHMGWYHLFYQYNPQSA--    | IWGNITWGHVS   |
| 081986                    | TSHVDASKVHRTGYHFQPP-----  | KNWIND                       | PNGPMYNGVYHLFYQYNPKGA--     | IWGNIVWAHVS   |
| 082119                    | PWSNAMLQWQRTGFHFQPL-----  | KHYMND                       | PNGPVYGGWYHLFYQHNPYGD--     | SWGNSWGHAVS   |
| Q05G13                    | WNTNAMFTWQRTSFHFQPE-----  | KNWMND                       | PNGPLFYKGYHFFYQYNPDSA--     | WVGNITWGHAS   |
| Q05JI1                    | PWTNNMLSWQRTAFHFQPP-----  | KNWMND                       | PNGPVFYKGYHFFYQYNPNGA--     | IWGDIVWGHAVS  |
| Q05JI2                    | YSQSDRLIERTAFHFQPP-----   | KNFIYD                       | PNGPLFHMGWYHLFYQYNPYAP--    | WVGNMSWGHVS   |
| Q0PCC5                    | -----QPA-----             | KNFIYD                       | PNGQLFYMGWYHLFYQYNPYGP--    | WVGNMSWGHVS   |
| Q0PCC7                    | SSQFDRLLWERTAFHFQPS-----  | KNFIYD                       | PNGQIFHMGWYHLFYQHNPYAP--    | WVGNMSWGHVS   |
| Q0PCC8                    | PSAADRLRWERTAYHYQPA-----  | KNFMYD                       | PNGPIFHMGWYHLFYQYNPYSV--    | FWGNMTWGHAVS  |
| Q0PCC9                    | PWTQKMLAWQRTSFHFQPK-----  | KNWMND                       | PNGPLYKGYHFFYQYNPEAA--      | WVGNIVWAHVS   |
| Q09N0                     | AWSNAMLQWQRTAYHFQPP-----  | KNWMND                       | PNGPLYHKGWYHLFYQYNPDSA--    | IWGNITWGHAVS  |
| Q1KL65                    | LVRHGHGIVIRPAYHFLPA-----  | KNWQND                       | PNGPMYHNGVYHMFYQYNPLGAMWQPG | NLSWGHVS      |
| Q2UXF7                    | YSPADRLSWERTAFHFQPA-----  | KNMIYD                       | PDGLLFYMGWYHLFYQHNPYAP--    | WVGNMTWGHAVS  |
| Q2WEC6                    | PWSNAMLQWQRTGFHFQPP-----  | KNWMND                       | PNGPVYKGVYHLFYQYNPEGA--     | WVGNKIAGHAS   |
| Q2XQ19                    | P-PSIVDSQLRTGYHFQPL-----  | KNWIND                       | PNAPMYKGYHFFYQYNPKGA--      | WVGNIVWAHVS   |
| Q2XQ21                    | SS-LKTHQPYRTGYHFQPP-----  | KNWMND                       | PNGPMLYKGLYHFFYQYNPHGA--    | WVGNIVWAHSTS  |
| Q3L7K5                    | AWSNAMLQWQRTAYHFQPP-----  | KNWMND                       | PNGPLYHKGWYHLFYQYNPDSA--    | IWGNITWGHAVS  |
| Q41215                    | PWTDAMLEWQRTGFHFQPE-----  | KNWMND                       | PDGPMFYKGYHFFYQYNPVSA--     | WVGNITWGHAVS  |
| Q41604                    | PWTDAMLQWQRTGFHFQPE-----  | KNWMND                       | PDGPMFYKGYHFFYQYNPVSA--     | WVGNITWGHAVS  |
| Q41606                    | ---SNQPYRTAYHFQPP-----    | KNWIND                       | PNGPMLFKGIYHLFYQYNPNVGLR--  | GPPVWGHSTS    |
| Q42691                    | PWNSNVLQWQRTGFHFQPN-----  | QNWMDN                       | PNGPLFYKGYHFFYQYNPDGA--     | IWGNKIAGHAVS  |
| Q42722                    | S-TVDEKNVHRTGYHFQPP-----  | KNWIND                       | PNAPMYNGVYHLFYQYNPYGS--     | WVGNIVWAHVS   |
| Q43172                    | SSNVKN--VHRTGYHFQPP-----  | KNWIND                       | PNGPMYNGVYHLFYQYNPKGA--     | WVGNIVWAHVS   |
| Q43799                    | PLSLISVKTWRCKYQLAPMSHEQAV | NKNTND                       | PNGYIYSKGSYSQFLASNLGS--     | INGNVPWAIAS   |
| Q43818                    | S-APSVNKLHRTGFHFQPN-----  | RNWIND                       | PNGPMYRGIYHLFYQYNPKGA--     | WVGNIVWGHVS   |
| Q43855                    | EY--STNQPYRTGYHFQPP-----  | KNWIND                       | PNGPLIYKGVYHLFYQYNPKGA--    | QWGNIVWAHVS   |
| Q43856                    | PWSNAMLQWQRTGFHFQPE-----  | KNYQND                       | PNGPVYKGVYHFFYQHNPNGT--     | WVGNISWGHAVS  |
| Q4AEI9                    | AWSNAMLQWQRTAYHFQPP-----  | KNWMND                       | PNGPLYHKGWYHLFYQYNPDSA--    | IWGNITWGHAVS  |
| Q547Q0                    | PWSNAMLQWQRTGFHFQPE-----  | KNWMND                       | PNGPVYKGYHFFYQYNPDGA--      | IWGNKIAGHAS   |
| Q575T1                    | LPS---DQPYRTGYHFQPP-----  | QNWMDN                       | PNGPMYKGVYHFFYQYNPNGP--     | LFGDIMIWGHAVS |
| Q5ZQK6                    | EVPSIVSDRYRTAYHFQPP-----  | KNWMND                       | PNGPMYNGIYHLFFQHNPNGP--     | QWGDIVWGHVS   |
| Q64GB3                    | PWSNAMLQWQRTGFHFQPL-----  | KHYMND                       | PNGPVYGGWYHLFYQHNPYGD--     | SWGNSWGHAVS   |
| Q6F4N3                    | PWSNAMLQWQRTGFHFQPE-----  | KNWMND                       | PNGPVYKGYHFFYQYNPDGA--      | IWGNKIAGHAS   |
| Q6KCH6                    | PWSNAMLQWQRTGFHFQPE-----  | KNWMND                       | PNGPVYRGGWYHLFYQYNPEGA--    | WVGNIAWGHAVF  |
| Q6PVN1                    | QDPSPASTMYKTAFHFQPA-----  | KNWMND                       | PSGPMYFNGIYHFFYQYNLNGP--    | IFGDIVWGHVS   |
| Q70AT7                    | PWSNAMLQWQRTGFHFQPD-----  | KYYQND                       | PNGPVYGGWYHFFYQYNPSGS--     | VWEPQIVWGHAVS |
| Q70LF5                    | HQMINDDDPYRTAYHFQSP-----  | KNWMND                       | PNGPMLYKGIYHLFYQYYPYDPV--   | WHTEIVWGHSTS  |
| Q70XE6                    | PWNTILSWQRTAFHFQPE-----   | KNWMND                       | PNGPLFYKGYHFFYQYNPNAA--     | WVGDIVWGHAVS  |
| Q7DLY6                    | ---SSNQPYRTAYHFQPP-----   | KNWIND                       | PNGPLRYAGLYHLFYQYNPKGA--    | WVGNIVWAHVS   |
| Q7XA49                    | AWSNAMLQWQRTAYHFQPP-----  | KNWMND                       | PNGPLYHKGWYHLFYQYNPDSA--    | IWGNITWGHAVS  |
| Q7XAS5                    | PWSNAMLQWQRTGFHFQPP-----  | RNWMDN                       | PNGPVYKGYHFFYQYNPDGA--      | IWGNKIAGHAVS  |
| Q7XZS5                    |                           |                              |                             |               |

Q84LA1 PSP-AVSTMYKTAFHFQPA-----KNWMNDPSGPMYFNGIYHEFYQYNLNGP--IFGDIVWGHSVS  
 Q84RM0 PWSNAMLQWQRTGFHFQPE-----QHYMNDPNGPVYGGWYHLFYQHNPKGD--SWGNIWAHAVS  
 Q84V21 S-AISVKNVHRTRFHFQPP-----KHWINDPNAPMYNGVYHLFYQYNPKGS--VWGNIIWAHSV  
 Q84XV1 P-ASVVDNRLRTGYHFQPP-----RNWINDPNGPMYFNGVYHLFYQYNP**NGS**--VWGNIVWAHSV  
 Q8GT50 ---FSTPSLSTGYHFRPI-----KNWINDPNAPMYKGYHLFYQYNPKGA--VWGNIVWAHSV  
 Q8GT63 VTTAG-GVRTRSAYHFQPA-----KNWQNDPNGPMYHNGLYHFFYQYNPDGVTWGN**NLS**WGHSVS  
 Q8GUA3 PWTNAMLTWQRTAYHFQPP-----KNWMNDPNGPLYHKGWYHLFYQYNPDSA--IWGN**IT**WGHAS  
 Q8GUB8 --SNAMLQWQRTGFHFQPE-----MNMWMDPNGPVYRGWYHLFYQYNPEGA--VWGNIAWGHAVS  
 Q8L6W0 GASAGTTPYRTAYHFQPL-----KNWMNDPNGPLYKGYHLFYQYNPYSA--IWGN**MT**WGHASIS  
 Q8L6W1 -----TNQPYRTAYHFQPR-----KNWINDPNGPMLYKGYHLFYQYNPNPGV--IWGPPVWGHSTS  
 Q8L6W2 DWNDLQLAWQRTAFHFQPP-----KNWMNDPNGPLYNGWYHFFYQYNPAGA--VWGNIVWGHAVS  
 Q8L897 PWDNTMLSWQRTAFHFQPE-----KNWMNDPNGPLYKGYHLFYQYNPAGA--VWGDIVWGHAVS  
 Q8LPM7 PWTNDMFQWRPGYHFQPP-----YHFMGDPAAMYKGYHFFYQYNPYGS-AWDTTISWAHAVS  
 Q8LRN6 -----VHRTRYHFQPP-----KNWINDPNAPMYNGVYHLFYQYNPYGS--VWGNIVWAHSV  
 Q8RVH4 PWSNNMLDWQRTAFHFQPK-----KNWMNDPNGPVFYNGWYHLFYQYHPDAP--VWGKIVWGHAVS  
 Q8VXS5 -----TNQPYRTAYHFQPR-----KNWINDPNGPMLYKGYHLFYQYDNPNPG--VWGPVWGHSPS  
 Q8VXS7 DWNDLQLAWQRTAFHFQPP-----KNWMNDPNGPLYNGWYHFFYQYNPAGA--VWGNIVWGHAVS  
 Q8W3M2 PWTNNMLSWQRTAFHFQPP-----KNWMNDPNGPVFYKGYHLFYQYNPNPG--AIWGDIVWGHAVS  
 Q93X59 LANQQIQPYRTGYHFQPP-----SNWMNDPNGPMLYQGVYHFFYQYNPYAATFG-DVIIWAHAVS  
 Q941I4 **NWT**NAMLSWQRTAFHFQPE-----KNWMNDPDGPMFYKAWYHLFYQYNPNSA--LWGN**IT**WGHAVS  
 Q944C8 **NWT**NAMFTWQRTSFHFQPE-----KNWMNDPNGPLFYKGYHLFYQYNPDSA--VWGN**IT**WGHAVS  
 Q944U7 S-VDIVDQIHRRTAYHFQPP-----KHWINDPNAPMYNGVYHLFYQYNPKGA--VWGNIVWAHSV  
 Q94C05 PWSNLMLTWQRTAYHFQPE-----KNWMNDPDGPLYHKGWYHFFYQYNPDSA--VWGN**IT**WGHAVS  
 Q94C06 AWSNLMLSWQRTSYHFQPV-----KNWMNDPNGPLYKGYHLFYQYNPDSA--VWGN**IT**WGHAVS  
 Q94C07 AWTNIMLTWQRTTYHFQPA-----QNMWMDPNGPLYKGYHLFYQWNPDTA-VWGNKISWGHAV-  
 Q94C08 VWSNVMLVWQRTVVFHFQPE-----KNWMNDPNGPLYHKGWYHIFYQWNPAGA-AWGNKISWGHAVD  
 Q9AUH1 PWSNEMLQWQRSSYHFQPA-----KNYMSDPDGLLYGGWYHMFYQYNPVGT-DWADGMWGHAVS  
 Q9FNS9 SPTNEESQPYRTGFHFQPP-----KNWINDPNGPMYFNGVYHLFYQYNPYGP--LWGN**IS**WGHASIS  
 Q9FQ62 **AWNNS**VLSWQRTAFHFQPE-----QNMWMDPNGPLFYKGYHFFYQYNPNAA--VWGDIVWGHAVS  
 Q9FR47 PWSNSMLQWQRAGFHFTQTE-----KNFMSPDNGPVYRGYHLFYQYNTKGV-VWDDGIVWGHVVS  
 Q9LD97 S-AISVKNVHRTRFHFQPP-----KHWINDPNAPMYNGVYHLFYQYNPKGS--VWGNIIWAHSV  
 Q9LDS8 S-AISVKNVHRTRFHFQPP-----KHWINDPNAPMYNGVYHLFYQYNPKGS--VWGNIIWAHSV  
 Q9M4K8 R-AISVKNVHRTGFHFQPP-----KYWINDPNAPMYNGVYHLFYQYNPKGS--VWGNIVWAHSV  
 Q9SB12 P-PSIVNPLLRRTGYHFQPP-----KNWINDPNAPMYKGYHFFYQYNPKGA--VWGNIVWAHSV  
 Q9SM30 LESNAGVEWERSAYHFQPD-----KNFISDPDGPMYHMGWYHLFYQYNPESA--IWGN**IT**WGHASIS  
 Q9SPK0 P-PSIVNPLLRRTGYHFQPP-----KNWINDPNAPMYKGYHFFYQYNPKGA--VWGNIVWAHSV  
 Q9ZP42 STHPQAKDPYRTGYHFQPR-----KNWINDPNGPLIYKGIYHLFYQYNPSSV--VWGNIVWAHSTS  
 Q9ZR55 PATS--EQPYRTAFHFQPP-----QNMWMDPNGPMYNGVYHLFYQYNPFGP-LWNLRMVWAHSV  
 Q9ZR96 HYQSDRLTWERTAYHFQPA-----KNFIYDPNGPLFHMWYHLFYQYNPYAP--IWGN**MS**WGHAVS  
 Q9ZTW9 AWSNLMLSWQRTSYHFQPV-----KNWMNDPNGPLYKGYHLFYQYNPDSA--LWGN**IT**WGHAVS  
 Q9ZTX2 PWSNLMLTWQRTAYHFQPE-----KNWMNDPNGPLYKGYHFFYQYNPDSA--VWGN**IT**WGHAVF  
 P92916 PWTNDMLAQWRCGFHFRTV-----RNYMNDPSGPMYKGYHLFYQHNKDF--YWGN**IT**WGHAVS  
 Q5FC15 AWTNQMLTWQWAGFHFRV-----KNYMNDPGPMYKGYHLFYQHNPNYA--YWGDISWGHAVS  
 P93761 TWSNAMLNWQRTAYHFQPP-----KNWMNDPNGPLYHKGWYHLFYQYNPDSA--LWGN**IT**WGHAVS  
 P49175 SWTNAMLAWQRTAFHFQPP-----KNWMNDPNGPLYHKGWYHLFYQWNPDSA--VWGN**IT**WGHAVS  
 Q43089 HSSKSNHQPYRTAYHFQPL-----KNWINDPNGPMRYGGFYHLFYQYNPKGA--VWGNIVWAHSV  
 Q39692 S-AVNQVLVHRTGYHFQPK-----KHWINDPNGPMYKGYHLFYQYNPKGA--VWGNIVWAHSV  
 Q39693 S-AVDVKLVHRTGYHFQPP-----KHWINDPNGPMFYKGYHLFYQYNPKGS--VWGNIVWAHSV  
 Q56UD0 ANGHR-----RTAYHFQPA-----KNWQNDPNGPVYNGMYHLFYQYNPHGALWDVGN**LS**WGHSVS  
 Q0J360 ANHAR-----RTAYHFQPA-----KNWQNDPNGPMYHNGMYHLFYQYNPHSALWDIG**NLS**WGHSVS  
 P29001 PWDNSMLSWQRTSFHFQPE-----KNWMNDPNGPMYKGYHFFYQYNPAGA--VWGDIVWGHAVS  
 O24509 PWDNSMLSWQRTSFHFQPE-----KNWMNDPNGPMYKGYHFFYQYNPAGA--VWGDIVWGHAVS  
 P29000 AWSNAMLSWQRTAYHFQPP-----KNWMNDPNGPLYHKGWYHLFYQYNPDSA--LWGN**IT**WGHAVS  
 Q43857 **PWNNT**MLSWQRTAFHFQPE-----KNWMNDPNGPLYKGYHFFYQYNPAGA--VWGDIVWGHAVS  
 P80065 PWTNDMLSWQRTSFHFQPP-----ENWMNDPNGPLFHMWYHLFYQYNPDSA--IWGN**IT**WGHASIS

Conservation: 1197758016417407313460194488837364431154458991201111111233  
 SS

| TARGET | ID                                                                | ITA | IIB |
|--------|-------------------------------------------------------------------|-----|-----|
| Q93X60 | -KDLINWESLEPAIYPSKWFNDNYGCWSGSATILPNG-EPVIFYTGIVDGNR-----         |     |     |
| Q43866 | -YDLVNIHLDPAIYPTQEADSKSCWSGSATILPGN-IPAMLYTGSDSKSR-----           |     |     |
| A0A7Z0 | -TDLINWDPHPAIFPSAPFDINGCWSGSATILPNG-KPVILYTGIDPKNQ-----           |     |     |
| A3QRG0 | -KDLIHLHLPLAMVADQWYDINGVWTSATILPDG-KIVMLYTGST----- <b>NE</b> SV   |     |     |
| A5GXL9 | -KDMVNWRHPLAMVPDQWYDSNGVLTGSITVLPDG-QVILLYTGNLDT-----LA           |     |     |
| A7IZK7 | -HDLVNVFLELPALSPKEPYDIGGCFGSSTLHGS-KPIILLYTAQDQVDGA-----          |     |     |
| A7IZK8 | -KDLINWNPHKAAIFPSQKGDVNGCWSGSTMLRGE-NPAILYTGIDPKSQ-----           |     |     |
| A7LJR5 | -RDLIHLWYLPFAMVDRPFIDINGVWTSATILPGG-QIVILYTGDT-----ADLV           |     |     |
| A7RDD3 | -RDLLNWVHPLAVEPDHWDYIEGDWTGSVAVLPDG-RVIMLFTGGTGA---- <b>NE</b> LA |     |     |
| A9CZQ1 | -KDLLHWNYLPMALRPDHWYDRKGVWSGYSTLLPDG-RIVVLYTGGT----- <b>KE</b> LW |     |     |
| A9E2W4 | -TDLVHWTGLELALTPSDPFIDISGCWSGSATILPGN-KPVVLYTG-LDTVGR-----        |     |     |
|        | -ADLVHWTGLELALTPSDPFIDISGCWSGSATILPGS-KPVILYTG-LDTVSR-----        |     |     |

A9JIF3 -YDLVNWIIHLDPAIYPTHEADAKSCWGSATILPGN-IPAMLYTGSDSHSR-----  
A9LST6 -KDLIHWLYLPPFAMVPDQWYDINGVWTGSATILPDG-QIMMLYTGDT-----DDYV  
A9YTS8 -RDMINWFHLPFAMVPDHWYDIEGVMTGSATVLPNG-QVIMLYTGNAY-----DLS  
A9YTS9 -KDMINWFELPVALTPTEWYDFEGVLSGSTTALPNG-QIFALYTGNNAN-----DFS  
B011Q7 -KDMVNWHRHLPVALVPDQWYDINGVLTGSITVLPDG-RVILLYTGNTDT-----FA  
B2NIA0 -TDMIHWLYLPLAMVDPDRWFDANGVWTGSATLLPDG-QIIMLYTGST-----NESV  
004372 -KDLLSWRHLPLAMVDPDRWYDINGVWTGSATILPDG-RIIMLYTGAT-----NESV  
023786 -KDMINWFHLPFAMVPDHWYDIEGVMTGSATVLPNG-QIIMLYTGNAY-----DLS  
024459 -RDMINWFHLPFAMVPDHWYDIEGVMTGSATVLPNG-QIIMLYTGNAY-----DLS  
065341 -RDLIHRHRLPLAMVPDQWYDTNGVWTGSATILPDG-RLAMLYTGST-----NASV  
065342 -RDLIHRHRLPLAMVPDQWYDTNGVWTGSATILPDG-RLAMLYTGST-----NASV  
065778 -KDMINWFELPVALTPTEWYDIEGVLSGSTTILPDG-RIFALYTGNTN-----DLE  
081082 -KDMIHWLHLPVAMVPDHWYDSKGVWSGYATTLPDG-RIIVLYTGGT-----DQLV  
081083 -RDLVHWTHLPLAMVPDQWYDINGVWTGSATILPDG-QIVMLYTGAT-----NESV  
081118 -TDLVDWVALEPGIYPSKPFDDINGCWSGSATILPNG-VPVIMYTGIEPKET-----  
081985 -KDMINWFELPVALTPTEWYDIEGVLSGSTTILPDG-QIFALYTGNNAN-----DFS  
081986 -KDMINWFHLPFAMVPDHWYDIEGVMTGSATVLPNG-QIIMLYSGNAY-----DLS  
082119 -KDLINWIPLPAIYPSKVFDDYGTWGSATILPGN-KPVILYTGIVDA-----NKT-  
Q05G13 -KDLVNWHRHLPVALVPDQWYDINGVLTGSITVLPDG-RVILLYTGNTDT-----FS  
Q05JI1 -TDLIHWLYLPIAMVPDQWYDINGVWTGSATILPDG-QIVMLYTGST-----DKSV  
Q05JI2 -KDLIHWYHLPAMVADQWYDIMGVWTGSATILPDG-KLMMLYTGST-----NESV  
Q0PCC5 -KDLVNWLELVALTPTEWYDIEGVLSGSTTALPNG-QIFALYTGNNAN-----DFS  
Q0PCC7 -KDMIHWFELPVALTPSKWYDSEGVLSGSITVLPNG-EIFALYTGNNAN-----DFS  
Q0PCC8 -KDMINWFELPVALTPTEWYDIEGVLSGSITVLPNG-QIFALYTGNNAN-----DFS  
Q0PCC9 -KDMINWFELPVALPVEWYDIEGVLSGSTTILPDG-EIFALYTGNNAN-----DFS  
Q0W9N0 -RDLIHWQHLPLAMVADQWYDINGVWTGSATFLPNG-DLIMLYTGST-----NESI  
Q1KL65 -KDLIHWLYLPPFAMVPDQWYDINGVWTGSATILPDG-QIMMLYTGDT-----DDYV  
Q2UXF7 -RDLVNWDAALDPTAPFDYNGCWSGSATILPBG-IPALYTGRIADAKEV-----  
Q2WEC6 -KDMVNWYELPIAMVPTEWYDIEGVLSGSITVLPNG-KIFALYTGNNAN-----DFS  
Q2XQ19 -RDLLHWRHLPVALPDRWYDINGVWTGSATILPDG-RLAVLYTGST-----NTSV  
Q2XQ21 -RDLINWVSLKPAIEPSIKSDKYGCWSGSATMLDG-TPAIMYTGVRPDVNY-----  
Q3L7K5 -TDLVNWTPHKYAISSQPADINGCWSGSATILPBG-KPVILYTGIDPQNK-----  
Q41215 -KDLIHWLYLPPFAMVPDQWYDINGVWTGSATILPDG-QIMMLYTGDT-----DDYV  
Q41604 -RNLIIHWFHLPIAFVDPQWYDANGALTSATFLPDG-RIAMLYTGITTEF-----V  
Q41606 -RNLIIHWFHLPIAFVDPQWYDANGALTSATFLPDG-SIAMLYTGITTEF-----V  
Q42691 -KDLVNWMPQPLTMEPEMAANINGSWGSATILPBG-KPAILFTGLDENYE-----  
Q42722 -SDLIHWKHLPLAMVTDHWYDINGVWTGSATILPDG-QIVMLYTGST-----NESV  
Q43172 -TDLINWIPLPPIYPSKPFDDYGTWGSATILPNN-KPIILYTGIVDAKNT-----  
Q43799 -TDLINWIPLPPIYPSKPFDDYGTWGSATILPNN-KPIILYTGIVDANRT-----  
Q43818 -LDEINWIVLNFALSRDQPIYINGIVSTSELILDGN-LPVIYTGTAIDEN-----V  
Q43855 -KDLINWKELEPALFSPKPFDDYGTWGSATILPBG-GPVILYTGIVDQSN-----  
Q43856 -TDLINWIPLDPAIFPSQPSDINGCWSGSSTILHGN-KPSILYTGINKLNH-----  
Q4AEI9 -RDMVHWRHLPAMVPEHWDYDIEGVLTGSITVLPDS-RVILLYTGNTET-----FA  
Q547Q0 -KDLIHWLYLPPFAMVPDQWYDINGVWTGSATILPDG-QIMMLYTGDT-----DDYV  
Q575T1 -RDLRWRHLPVAMSPDQWYDINGVWSGSATVLPDG-RIVMLYTGST-----NASV  
Q5ZQK6 -YDLVNWIIHIDPAIYPTDPADINSCFSGSATFLPGY-KPVMLYTGIDTEKR-----  
Q64GB3 -TDLVNWIIILEPAIEPDTPGDIKGCWSGSATILFGG-QLVIMYTG-GDVENH-----  
Q6F4N3 -KDLVNWHRHLPVALVPDQWYDINGVLTGSITVLPDG-RVILLYTGNTDT-----FS  
Q6KCH6 -RDLRWRHLPVAMSPDQWYDINGVWSGSATVLPDG-RIVMLYTGST-----NASV  
Q6PVN1 -RDLIHRHRLPLAMVPDQWYDINGVWTGSATVLPDG-SLVMLYTGST-----NASV  
Q70AT7 -TDLVNWIGLEPALVRDTPSDIDGCWTGSVTLPPG-KPVIYTG-GNIDQH-----  
Q70LF5 -KDLIHRHRLPALVPDQWYDIEGVLTGSITVLPDG-KVILYTGNTET-----FA  
Q70XE6 -TDLINWTTQPIALSPSEPYDINGCWSGSITILPQN-KPVILYTGINNKNY-----  
Q7DLY6 -KDLIHWLYLPIAMVPDQWYDANGVWTGSATFLDDG-SIVMLYTGST-----DEFV  
Q7XA49 -KDLVNWTPDPAIFPSQPSDINGCWSGSSTILPBG-KPVILYTGIDLLNQ-----  
Q7XAS5 -KDLIHWLYLPPFAMVPDQWYDINGVWTGSATILPDG-QIMMLYTGDT-----DDYV  
Q7XZS5 -RDLIHRHRLPLAMLPDQWYDTNGVWTGSATILPDG-RLAMLYTGST-----NASV  
Q84LA1 -TDLVNWIGLEPALVRDTPSDIDGCWTGSVTLPPG-KPIIYTG-GDIDQH-----  
Q84RM0 -KDMVNWHRHLPAMVPDQWYDSNGVLTGSITVLPDG-QVILLYTGNTDT-----LA  
Q84V21 -KDLINWIIHLEPAIYPSKPFDDYGTWGSSTILPNN-KPVIYTGIVDVSNN-----  
Q84XV1 -TDLVNWIALDPAIRPSKPFDDINGCWSGSATVLPBG-RPVIVYTGIDPQQR-----  
Q8GT50 -RDLINWVALETAIQPSIKSDKYGCWSGSAXILRDG-TPAIMYTGIDRADINY-----  
Q8GT63 -VDLVNWFALDAALQPSRPFDDANGCWSGSATILPDG-SPVMLYTG-IDARGD-----  
Q8GUA3 -TDLIHWLYLPPALVPDQWYDINGVWTGSATFLPDG-QIMMLYTGDT-----NDYV  
Q8GUB8 -RDLVHWRHLPAMVPDQWYDINGVWTGSATVFPDG-TLNMLYTGST-----NASV  
Q8L6W0 -NDLVNWWHLEHALNPIEPYELGGCFSGSITMLPGG-RPVIFYTGADTNNF-----  
Q8L6W1 -KDLVNWVQPLTMEPEMAANINGSWGSATILPBG-KPAILFTGLDPKYE-----  
Q8L6W2 -KDLIRWKHLPIAMVADRWDYDINGVWTGSATILPDG-QIMMLYTGST-----NESV  
Q8L897 -RDLIHWLHLPAMVADQWYDSNGVWTGSATILPDG-QVIMLYTGST-----NESV  
Q8LPM7 -KDMIHWLHLPAMVPDHWYDSKGVWSGYATTLPDG-RIIVLYTGGT-----DELV  
Q8LRN6 -TDLINWIPLPPIYPSKVFDDYGTWGSATILPDN-KPIILYTGIVDAKNT-----

Q8RVH4 -KDLINWRHLP I AMETDEWYDEQGVVWTSATILPNG-ELVVLYTGST-----NESV  
Q8VXS5 -KDLVNWVPPQLTMEPEMAANINGSWSGSATILPGN-KPAILFTGLDPKYE-----  
Q8VXS7 -KDLIRWKHLP I AMVADRWDYDFNGVWTSATILPDG-QIMMLYTGST-----NESV  
Q8W3M2 -KDLIHWHYHLP I AMVADQWYDIMGVWTSATILPDG-KLMMLYTGST-----NESV  
Q93X59 -YDLVNWVHLDPAIYPTQEADSKSCVSGSATILPGN-IPAMLYTGSDSKSR-----  
Q941I4 -PDLIHGTSRRLWSPIDGSMPTGCG-WVCAILPDG-QIAILYTAAT-----NESV  
Q944C8 -ADLIHWLYLP I AMVPDQWYDINGVWTSATILPDG-QIVMLYTGST-----DKSV  
Q944U7 -TDLINWIPLKPAIVPSEPFDIKGCWVSGSATVLPNN-IPILYTG-LDS-----NET-  
Q94C05 -RDLIHWFHLP I AMVPDQWYDINGVWTSATILPDG-QIVMLYTGST-----DENV  
Q94C06 -TDLINWLHLP I AMVPDQWYDINGVWTSATILPDG-RIVMLYTGDT-----DDYV  
Q94C07 -SKDLLHWHHLP I AMVPDNWYDLNGVWVSGSATILPDG-KLMMLYTGSTV-----DQSV  
Q94C08 -SKDLLHWHYHLP I AMVPDQWYDINGVWTSATILPDG-KLMLYTGETE-----DELV  
Q9AUH1 -RNLVQWRTLP I AMKPDQWYDILGVLGSGSVTVLPNG-TVIMLYTGATN-----DWYV  
Q9FNS9 -YDLVNWVFLLEPALSPKPEPYDINGCLSGSATILPGP-RPIILYTGQDV-----NNS-  
Q9FQ62 -KDLIHWHYHLP I AMVADQWYDANGVWTSATFLDDG-SLVMLYTGST-----DKSV  
Q9FR47 -RDLVHWRHLP I AMVPDHWYDNMGVLSGSIITVLSNG-RLVMLYTGVSNTTDR-SGMW  
Q9LD97 -KDLINWIHLEPAIYPSKFKDKYGTWVSGSATILPNN-KPVI IYTGVDVSYNN-----  
Q9LDS8 -KDLINWIHLEPAIYPSKFKDKYGTWVSGSATILPNN-KPVI IYTGVDVSYNN-----  
Q9M4K8 -KDLINWIHLEPAIYPSKFKDKYGAWSGATILPNN-KPVI IYTGVDVSHDS-----  
Q9SB12 -RDLINWVALEPALRPSIPGDRYGCWVSGSATVLPDGGGPPVIMYTGVDHPDINY-----  
Q9SM30 -RDMINWFHLP I AMVPDHWYDIEGVTGSGATMLPDG-QIIMLYTGNAY-----DLA  
Q9SPK0 -RDLINWVALEPALRPSIPGDRYGCWVSGSATVLPDGGGPPVIMYTGVDHPDINY-----  
Q9ZP42 -TDLVNWVPHAAIYPSILSDINGCWSGSVTILPSG-KPAILYTGINPDKE-----  
Q9ZR55 -HDLINWIHLDLAFAPTEPFDIINGCLSGSATVLPNG-KPIMLYTGIDTENR-----  
Q9ZR96 -KDMINWFELPVALTPTEWYDIEGVLGSGSTALPNG-QIFALYTGAN-----DFS  
Q9ZTW9 -TDLINWLHLP I AMVPDQWYDINGVWTSATILPDG-RIVMLYTGDT-----DDYV  
P92TX2 -PDLINWIHLP I AMVPDQWYDINGVWTSATILPDG-RIVMLYTGDT-----DDYV  
P92916 -RDLINWQHLPVAVGPDHWYDISGVWTSIIVVSED-RVVMLYTGTT-----KSF  
Q5FC15 -RDLINWFHLP I AVKPRWYDIYGVWTSITVMPDDGRVVMYLYTGGT-----KEY  
P93761 -TDLIHWHYLP I AMVPDQWYDINGVWTSATILPDG-LIMMLYTGDT-----DDYV  
P49175 -RDLHLHLP I AMVPDHPYDANGVWVSGSATRLPDG-RIVMLYTGSTAESS-----A  
P43089 -KDLVNWVTPLDHAIHPSQPSDIKGCWVSGSATILPGG-KPAILYTGIDPNNH-----  
Q39692 -KDLINWVALEPAIFPSKPFDKYGCWVSGSATVLPGG-KPVIMYTGIVTPSPVNT----  
Q39693 -KDLINWVALEPAIFPSKPFQYGCWVSGSATILPGN-KPVI IYTGIVSPDPENA----  
Q56UD0 -GDLVNWVAALDNDLPTAPFDANGCWSGVTILPDG-VPVVMYSG-IDARR-----  
Q9J360 -GDLINWVAALDNDLPTSPFDANGCWSGATILPGA-LPAILYTG-IDASK-----  
P29001 -RDMIHWLHLP I AMVADQWYDKQGVWTSATILPNG-EIIMLYTGST-----NESV  
O24509 -RDMIHWLHLP I AMVADQWYDKQGVWTSATILPNG-EIIMLYTGST-----NESV  
P29000 -KDLIHWHYLP I AMVPDQWYDINGVWTSATILPDG-QIMMLYTGDT-----DDYV  
Q43857 -RDLIHWHLHLP I AMVADQWYDSNGVWTSATILPDG-QVIMLYTGST-----NEFV  
P80065 -RDLINWLHLP I AMQPQWYDINGVWTSATVLPDG-KIVMLYTGDT-----DDL

Conservation: 734427163503654923927112199640320031111101289884726020311320  
SS IIC IID IIIA

**TARGET** QIQNYAVPANSSDPYLRWVKPD-DNP IYVDPDSV----NASAFRDPPTAWR-VG---GH  
Q93X60 QVQDLAWPKNLSDPFLREWVKHP-KNPLITPPEGVK----DDCFRDPSTAWLGPD---GV  
Q43866 QVQNLAYEPKNLSDPYLRWKKSP-LNPLMAPDAVNG--INASSFRDPPTAWLGQD---KK  
A0A7Z0 QVQNLAYPADHNDPLLTWKVKYSG-NPILVPPPGIG----YKDFRDPPTAWYT---SQGK  
A3QRG0 QVQCLATPADPSDPLLRWVKHPA-NPILYPPPGIG----LKDFRDPPTAWFDHS---DHT  
A5GXL9 QVQNLALPKNRSDPPLKDWIKWS-GNPILTPVNDI---NTSQFRDPSTAWMGPD---GK  
A7IZK7 QVQNLAVPRNLSDPYLIEWVKSP-YNPLMTPPENK--IDSSSFRDPPTAWLGPD---GR  
A7IZK8 QVQNLAYPANLSDPPLLDWIKYPG-NPVMIPPPGIG----KKDFRDPPTAWLA---PDGK  
A7LJR5 QVQNLAVAADPSDPLLRWVKYDA-NPVLHPPRGIG----LKDFRDPNPVWYNSS---EST  
A7RDD3 QVQNLAVPVNLSDPPLLEWKKSHV-NPILVPPPGIE----DHDFRDPFPVWYNES---DSR  
A9CZQ1 QVQNIAYPKNLSDPFLREWIKPN-YNPVIIEPHQK-IN---AALFRDPSTAWLGD---GS  
A9E2W4 QVQNIAYPKNLSDPFLREWIKPR-YNPVIIEPHGR-ID---AALFRDPSTAWLGRD---GS  
A9JIF3 QVQDLAWPKNRSDPFLREWVKYT-GNPLITAPEGVN----DDCFRDPSTAWQGPD---GV  
A9LST6 QVQNLAYPANLSDPPLLDWVKFKG-NPVLVPPPGIG----VKDFRDPPTAWTG--PQNGQ  
A9YTS8 QLQCLAYAVNNSDPPLLEWKKYEG-NPILFPPPGVG----YKDFRDPSTLWMPG---DGE  
A9YTS9 QLQCKAVPVNMSDPPLLEWVKYED-NPILYTPPGIG----LKDYRDPSTVWTGP---DGK  
B011Q7 QVQCLAVPADPSDPLLRWVKHPA-NPILFPPPGIG----LKDFRDPPTAWFEHS---DKT  
B2NIA0 QVQNLAYPANLSDPPLLDWVKYEG-NPILTPPSGIG----STDFRDPPTAWIG---PDGK  
O04372 QVQNLAVPADLSDPPLLEWTKVDDANPILVPPPGVG----ATDFRDPPTAWFEPS---DST  
O23786 QLQCLAYAVNNSDPPLLDWKKYEG-NPILFPPPGVG----YKDFRDPSTLWLG---DGE  
O24459 QLQCLAYAVNNSDPPLLEWKKYEG-NPILFPPPGVG----YKDFRDPSTLWMPG---DGE  
O65341 QVQCLAVPADDADPLLTNWTYKYE-NPVLVPPPGIG----PRDFRDPPTAWFDPS---DST  
O65342 QVQCLAVPADDADPLLTNWTYKYE-NPVLVPPPGIG----PRDFRDPPTAWFDPS---DST  
O65778 QLQCKAVPVNASDPPLLEWVRYDA-NPILYAPSGIG----LTDYRDPSTVWTGP---DGK  
O81082 QVQNLAEPADPSDPLLEWKKNSG-NPILMPPPGVG----PHDFRDPFPVWYNES---DST  
O81083 QVQNLAVPADQSDTLRWRKKE-ANPILVPPPGIG----DKDFRDPPTAWYEPS---DDT  
O81118 PSAERRVPGQPLRPFRLRWVKPD-YNPIINPDHGI----NASAFRDPPTAWYGPD---GH

081985 QLQCKAVPVNLSDPLLIEWVKYED-NPILYTPPGIG----LKDYRDPSTVWTGP---DGK  
081986 VVQCLAYAVNNSDPLLIEWKKYEG-NPVLLPPPGVG----YKDFRDPSTLWSGP---DGE  
082119 QVQNYAIPANMSDPYLRKWKIKPD-NNPLIVADKNIN----KIQFRDPTTAWMGRD---GY  
Q05G13 VVQCLAVPADPSDPLLRSWIKHPA-NPILFPPPGIG----LKDFRDLPTAWFEHS--DNT  
Q05JI1 VVQNLAYPADPSDPLLDWVKYPG-NPVLVPPRHIG----PKDFRDPPTAWAG---PDGK  
Q05JI2 VVQNLAYPADPSDPLLIKWKYKPG-NPVLVPPPGIG----AKDFRDPPTAWLT---SEGK  
Q0PCC5 QLQCKAVPVNNTSDPLLVEWVRIDS-NPILYTPPGIG----LKDYRDPSTVWTGP---DGK  
Q0PCC7 QLQCKAVAVNLSGPLLVEWVRYED-NPILYTPPGIG----LKDYRNPSTVWTGP---DGK  
Q0PCC8 QLQCKAIPVNTSDPLLVKWKYDS-NPILYTPPGIG----LKDYRDPSTVWTGP---DGI  
Q0PCC9 QLQCKAVPVNNTSDPLLIDWVKYEG-NPILYTPPGVG----LTDYRDPSTVWTGP---DNI  
Q0W9N0 VVQNLAYPADPSDPLLRKWKIKYEG-NPVIPIPPPGIG----LKDFRDPPTAWT---PEGK  
Q1KL65 VVQNLAYPTNLSDPLLLDWVKYKGNPVLVPPPGIG----VKDFRDPPTAWTG--PQNGQ  
Q2UXF7 VVQNVAFPKNPADPLREWVKPA-YNPVI-PLPADVP---GDNFRDPPTAWVGRD---GL  
Q2WEC6 QLQCKAVPVNLSDPLLIKWKYDND-NPILYTPPGIG----LKDYRDPSTVWTGP---DGK  
Q2XQ19 VVQCLALPTNPEDPLLTNWKIKYEG-NPVLVPPPAIG----AKDFRDPPTAWLDPS---DKT  
Q2XQ21 VVQNVAFPKNKS DPPLLEWVKYKGNPVLVPPPGIG----NATQFRDPTTAWHADG---H  
Q3L7K5 VVQNMVAVPNLSDPFLLEWTKLS-QNPLMEPTTINS--INASSFRDPPTAWQGTD---GR  
Q41215 VVQNLAYPANLSDPLLLDWVKLKG-NPVLVPPPGIG----VKDFRDPPTTRWTG--PQNGQ  
Q41604 VVQCQVYEDVDDPLLLKWFKSDA-NPILVPPPGIG----SKDFRDPPTAWYDVA---EAS  
Q41606 VVQCQVYEDVDDPLLLKWYKSDA-NPILVPPPGIG----SKDFRDPPTAWYDVA---EAS  
Q42691 VVQVLAYPEKDLNDPYLEWVKFLAP-KNPVMFPTPQNG--INATSYRDPPTAWMLPD---GN  
Q42722 VVQNLAYPADPSDPLLEWVKYKGNPVLVPPPGID----FKDFRDPPTAWRT---PEGK  
Q43172 VVQNYAIPANISDPFLRKWKIKPD-NNPLIVADVSI----NKTQFRDPTTCWLGQD---GY  
Q43799 VVQNYAIPANLSDPYLRKWKIKPD-NNPLIVADMSI----NKTQFRDPTTAWMGRD---GH  
Q43818 QVINIAKNRNLSDNYLLDWSKVKG--IPLGVINVTG----NKFRDSTGAWNPKI---GH  
Q43855 EVQCIATPANASVPLLTNWKGPDRNLNPLTADHRM----NGSVFRDPTTAWFGKD---GH  
Q43856 VVQNLAYPKDFSDPFLREWIKSP-ENPVIPTSENK--INASSFRDPTTGWLGKD---GK  
Q4AEI9 QVTCLAEADPSDPLREWVKHPA-NPVLVPPPGIG----MKDYRDPPTAWFDNS--DNT  
Q547Q0 VVQNLAYPANLSDPLLLDWVKFKG-NPVLVPPPGIG----VKDFRDPPTAWTG--PQNGQ  
Q575T1 VVQCLAFPTDPSDPLLNWTKYEN-NPVMYPPPGVG----EKDFRDPPTAWFDGS---DDT  
Q5ZQK6 VVQNLAVPKNLSDPFLREWVKHK-ANPIMTPEGVK---ADDFRDPSTAWLGYD---GK  
Q64GB3 VVQNIALPKNRS DLYLREWTKAG-NNPVLQVPGPGMN---PGEFRDPTTGWIGPD---GL  
Q6F4N3 VVQCLAVPADPFDPLLRSWIKHPA-NPILFPPPGIG----LKDFRDLPTAWFEHS--DNT  
Q6KCH6 VVQCLAFPTDPSDPLLNWTKYEN-NPVMYPPPGVG----EKDFRDPPTAWFDGP---DDM  
Q6PVN1 VVQCLAVPADPNDLRLNNTKYEA-NPILVPPPGIG----DKDFRDPPTAWFDES---DKT  
Q70AT7 QTQNIAPFNRS DPLREWVKIAA-NNPVLRPDEPGMN---VLEFRDPTTGWIGPD---GH  
Q70LF5 QVTCLAEADPSDPLREWVKHPA-NPVLVPPPGIG----MKDFRDPPTAWFDAS--DGT  
Q70XE6 VVQNLALPKNLSDPYLEWIKLQ-NPMLMAGTPTNNNNINASSFRDPTSTAWQLSD---GK  
Q7DLY6 VVQNLAYPEDPSDPLLIKWKVFSG-NPVLVPPPGIG----AKDFRDPPTAWKT---SSGK  
Q7XA49 VVQNLAYQPKNLSDPFLREWVKSP-KNPLMAPTSANK--INSSSFRDPTTAWLGKD---GH  
Q7XAS5 VVQNLAYPTNLSDPLLLDWVKYKGNPVLVPPPGIG----VKDFRDPPTAWTG--PQNGQ  
Q7XZS5 VVQCLAVPADADPPLLNWTKYEG-NPVLVPPPGIG----PKDFRDPPTAWFDPS---DNT  
Q84LA1 QAQNIAPFNRS DPLREWIKAP-NNPVLRPDEPGMN---SIEFRDPTTGWIGPD---GL  
Q84RM0 VVQCLATPADPSDPLLRWVKHPA-NPILYPPPGIG----LKDFRDLPTAWFDHS---DHT  
Q84V21 VVQNYAIPANLSDPFLRKWKIKPN-NNPLIVPDNSI----NRTEFRDPTTAWMGQD---GL  
Q84XV1 QLQNVAYPKLSDPYLREWVKPD-YNPVIAPGDGI----NASAFRDPPTAWRGP---TH  
Q8GT50 EVQNIAPFNKNSDPLLREWVKPR-GNP IIVPEGGI----NATQFRDPTTAWYADG---H  
Q8GT63 VVQNLAYPKNASDPLLDWVKPE-YNPVI-PVPADIK---RDDFRDPSTAWLGAD---GL  
Q8GUA3 VVQNLAYPANLSDPLLIDWVKYRG-NPVMVPPPGIG----VKDFRDPPTAWTG--PQNGQ  
Q8GUB8 VVQCLAVPEDPNDSLLRNWTKHEA-NPVLVPPPGIG----DKDFRDPPTAWFDES---DQT  
Q8L6W0 QSQNLAFPKDPSDPLLRWVKSP-HNPVITAEDDIE---PSDFRDPPTAWQAVD---GT  
Q8L6W1 VVQVLAYPEKDLSDPPLKEWFLAP-QNPVMFPTPQNG--INATSFRDPTTAWRLPD---GV  
Q8L6W2 VVQNLAYPANLSDPLLLEWVKYKGNPVLVPPPGIG----KLDFRDPPTAWLT---SEGK  
Q8L897 VVQNLAYPADLNDPLLVDWIKYPS-NPVLVPPKGI---PKDFRDPPTAWLT---TEGK  
Q8LPM7 VVQNLAEADPSDPLLEWKKSNH-NPILMPPPGVG----PHDFRDPFPVWYNES---DSN  
Q8LRN6 VVQNYAIPADLSDPFLRKWKIKPD-NNPLIVADVNI----NKTQFRDPTTCWLGQD---GH  
Q8RVH4 VVQNLAYPADPSDPLLIKWKYKGNPVLVPPPGID----NKDFRDPPTAWKT---PEGK  
Q8VXS5 VVQVLAYPEKDLSDPPLKEWFLAP-QNPVMFPTPQNG--INATSFRDPTTAWRLPD---GV  
Q8VXS7 VVQNLAYPANLSDPLLLEWVKYKGNPVLVPPPGIG----KLDFRDPPTAWLT---SEGK  
Q8W3M2 VVQNLAYPADPSDPLLIKWKYKGNPVLVPPPGIG----SKDFRDPPTAWLT---SEGK  
Q93X59 VVQDLAWPKNLSDPFLREWVKHP-KNPLIIPPEGVK---DDCFRDPSTAWRGPD---GV  
Q941I4 VVQNLAYPANLSDPLLLDWVKYSG-NPVLTPPAGIG----STDFRDPPTAWIG---PDGL  
Q944C8 VVQNLAYPADPSDPLLDWVKYKGNPVLMPRHIG----PKDFRDPPTAWAG---PDGK  
Q944U7 QLQNYAVPANISDPHLENWIKPA-NNPLVAPDHTV----NRTAFRDPPTAWLGS---GW  
Q94C05 VVQNLAYPADLNDPLLLDWVKYSG-NPVLVPPPGIG----AQDFRDPPTAWKS---PNVGK  
Q94C06 VVQNLAFPANLSDPLLVDWVKYKPN-NPVIYPPPGIG----VKDFRDPPTAWTAG-SQNGQ  
Q94C07 QDQNLADPVNITDPLLRDVKYKDV-NPVLVPPPGIG----AKDFRDPPTAFKENEVDKR  
Q94C08 QDQCLADPVNITDPLLDWVKYKSV-NPVIYPPPGIG----VKDFRDPPTACRSPAGNDR  
Q9AUH1 EATCLALPADPNDPPLLRWTKHPA-NP IWSPPGIG----TKDFRDPMTPWYDSS---DHT  
Q9FNS9 VVQNLAFPKNLSDPLLKEWIKWS-GNPLLPVDDIK----AQFRDPTSTAWMGPD---GK  
Q9FQ62 VVQNLAYPEDLNDPLLLKWKYKSG-NPVLVPPPGIG----PKDFRDPPTAWKT---SDGK

Q9FR47 EVQCLAVPAEPNDPLLRWTKHPA-NPVLVHPPGIK----DMDFRDPTTAWFDES--DST  
Q9LD97 QVQNYAIPANLSDPFLRKWKIKPN-NNPLIVPDNSI----NRTEFRDPTTAWMGQD---GL  
Q9LDS8 QVQNYAIPANLSDPFLRKWKIKPN-NNPLIVPDNSI----NRTEFRDPTTAWMGQD---GL  
Q9M4K8 QVQNYAIPANLSDPFLRKWKIKPN-NNPLIVPDNSI----NKTFRDPTTAWMGQD---GL  
Q9SBI2 QVQNVAYPKNVS DPLLEWVKPS-HNPVIVPEGGI----NATQFRDPTTAWRGPGE--EQ  
Q9SM30 QLQCLAYAVNSDPLLEWVKYEG-NPILFPPPGVG----YKDFRDPSTLWRGP---DGD  
Q9SPK0 QVQNVAYPKNVS DPLLEWVKPS-HNPVIVPEGGI----NATQFRDPTTAWRGPGE--EQ  
Q9ZP42 QVQNLAFPKNLS DPLLEWVKVP-QNPLMPTQANQ--INASSFRDPTTAWLGPD---KR  
Q9ZR55 QVQNLAVPKDLSDPYLRWVKHT-GNPIISLPBEEIQ----PDDFRDPTTTWLEED---GT  
Q9ZR96 QLQCKAVPLNTSDPLLEWVKYEN-NPILFPPPGIG----LKDYRDPSTVWTGP---DGK  
Q9ZTW9 QDQNLAFPANLSDPLLDVWVKYPN-NPVIYPPPGIG----VKDFRDPPTAGTAG-MQNGQ  
Q9ZTX2 QVQNLAFPANLSDPLLDVWVKYPN-NPVIYPPPGIG----VKDFRDPPTAGTAG-MQNGQ  
P92916 QVINLAEAADPSDPLLLKWKIKYDN-NPILWPPPGIV----RDFRDPNPIWYNAS--EST  
Q5FC15 QIMSVAMAADPSDPLLEWVKYDEVNPVLRPPPGIG----LDFRDPNPIWYNTT--DST  
P93761 QVQNLAYPANLSDPLLDVWVKYQG-NPVLVPPPGIG----VKDFRDPPTAWTG--PQNGQ  
P49175 QVQNLAEPADASDPLLEWVKSDA-NPVLVPPPGIG----PTDFRDPPTACTPAGNTA  
Q43089 QVQNIAPKNMSDPLLEWKKSP-KNPLMEPTIANK--INSSFRDPTTSWLKGD---GF  
Q39692 QVQNFVAVPANYS DPLYREWIKPD-NNPIVR-ARSE----NSSSFRDPTTAWF--DG---VH  
Q39693 QVQNYAVPANYS DPLLEWVKPD-NNPLVG-VHTEN----PSAFRDPPTAWF--DG---GH  
Q5GUD0 QVQNVAFKPNRPDPLLEWTKPG-YNPVI-PVPADV---PNDFRDPTTAWLGS---GL  
Q0J360 QVQNVAFKPNSDPLLEWVKPA-YNPVI-ALPADVP---GDKFRDPSTAWLGRD---GL  
P29001 QVQNLAYPADPSDPLLDWIKHTG-NPVLVPPPGIG----AKDFRDPPTAWLT---SEGK  
O24509 QVQNLAYPADPSDPLLDWIKHPG-NPVLVPPPGIG----AKDFRDPPTAWLT---SEGK  
P29000 QVQNLAYPANLSDPLLDWVKFKG-NPVLVPPPGIG----VKDFRDPPTAWTG--PQNGQ  
Q43857 QVQNLAYPADLNDPLLDWIKYPS-NPVLVPPPGIL----PKDFRDPPTAWLT---TEGK  
P80065 QVQNLAYPANLSDPLLDWIKYPD-NPVMFPPPGIG----STDFRDPPTAWIG--RDG-K

Conservation: 432347310111102221323160661240200015311001444498485676

| SS            | IIIB                                                     | IIIC | IIID                                        | IIV                              |
|---------------|----------------------------------------------------------|------|---------------------------------------------|----------------------------------|
| <b>TARGET</b> | WRILIGSKK                                                | ---  | RDRGIAYLYRS                                 | -LDFKKWFKAKHPLHS-VQGTGMWECPDFFPV |
| Q93X60        | WRIVVGGDR                                                | ---  | DNNGMAFLYQS                                 | -TDFVNWKRYDQLSS-ADATGTWECPDFYFP  |
| Q43866        | WRVIGSKI                                                 | ---  | HRRGLAITYTS                                 | -KDFLKWEKSPEPLHY-DDGSGMWECPDFFPV |
| A0A7Z0        | WRITIGSKL                                                | ---  | NKTGISLVYDT                                 | -KDFKTYEQLNGVLHA-VPGTGMWECVDFYFP |
| A3QRG0        | WRTVIGSKDDD                                              | ---  | GHAGIILSYKTKDFVNYELMPGNMHRGPDGTGMYE         | CIDLFPV                          |
| A5GXL9        | WRIVIGSEI                                                | ---  | IKGQATALLYYS                                | -TDFGNWTRSDKPLKF-SRETNMWECPDFYFP |
| A7IZK7        | WRVIVGNK                                                 | ---  | LNRRGKALLYRS                                | -KDFVWRTKAQHPLYS-IQGTGMWECPDFYFP |
| A7LZK8        | WLVTLGSKV                                                | ---  | NKTGIALVYETSDFKGYRLLDGVLHA-VPRTGMWECVDFYFP  |                                  |
| A7LJR5        | WYVVVGSKNDS                                              | ---  | LSHTGIALVYTTKDFLSYTLPGVLHAVDI-VGMWECVDLFPV  |                                  |
| A7RDD3        | WHVIGSKDP                                                | ---  | EHYGIVLIYTTKDFVNTLLPNLHSTKQPVGMLECVDFLFPV   |                                  |
| A9CZQ1        | WRLTVGTLIDEGG                                            | ---  | LAIVYKS-KDFMKWVPAENPLY--TNGSGMWE            | CVDFFP                           |
| A9E2W4        | WRLTVGTVIDGNG                                            | ---  | LAMLKYS-KDFVWVPAENPLY--TNGSGMWE             | CVDFFP                           |
| A9JIF3        | WRIVVG                                                   | ---  | ADRD-NNGMAFLYQS-TDFVNWKRYEQPLSS-ADLTGTWEC   | PDFYFP                           |
| A9LST6        | WRLTIGSKIG                                               | ---  | KTGVALVYETS                                 | NFTSFKLLDGLHA-VPGTGMWECVDFYFP    |
| A9YTS8        | WRMVMGSKHNQT                                             | ---  | IGCALVYRTT                                  | NFTHFVLEEVLHA-VPHTGMWECVDLFPV    |
| A9YTS9        | HRMIMGTKINR                                              | ---  | TGLVLVYHTTDFVNYVMLDEPLHS-VPNTDMWECVDFYFP    |                                  |
| B0IIQ7        | WRIIGSKDDD                                               | ---  | GHAGIILSYKTTDFVNYELMPGTMHRGPDGTGMYE         | CCLDFPV                          |
| B2NIA0        | WRITIGSKF                                                | ---  | NTTGISMVYTTNDFINYLHNGVLHE-VPGTGMWECVDFYFP   |                                  |
| O04372        | WRIAIGTKDA                                               | ---  | DHSGVALVYSTKDFLNFTLLPGTLHTVKH-VGMWECIDFYPI  |                                  |
| O23786        | YRMVMGSKHNET                                             | ---  | IGCALIYHTT                                  | NFTHFELKEEVLHA-VPHTGMWECVDLFPV   |
| O24459        | WRMVMGSKHNET                                             | ---  | IGCALVYRTT                                  | NFTHFELNEEVLHA-VPHTGMWECVDLFPV   |
| O65341        | WRIVIGSKDDAEGDHAGIAVVYRTRDFVHFELLPDLLHR-VAGTGMWECIDFYFPV |      |                                             |                                  |
| O65342        | WRIVIGSKDDAEGDHAGIAVVYRTRDFVHFELLPDLLHR-VAGTGMWECIDFYFPV |      |                                             |                                  |
| O65778        | HRMIGTKR                                                 | ---  | NTTGLVLVYHTTDFVNYVMLDEPLHS-VPNTDMWECVDLFPV  |                                  |
| O81082        | WHMLIGSKDD                                               | ---  | NHYGTVLIYTTKDFETYLLPDILHKTSDSVGMLECVDFLFPV  |                                  |
| O81083        | WRIVIGSKDS                                               | ---  | SHSGIAIVYSTKDFINYLKILPGILHAVER-VGMWECVDFYFP |                                  |
| O81118        | WRLVVGSK                                                 | ---  | ENMRGIAVLYRS-RDFRRWIKAHSLHA-G-LTGMWECPDFYFP |                                  |
| O81985        | HRMIMGTRGN                                               | ---  | TGMVLVYTTDYTNYELLDEPLHS-VPNTDMWECVDFYFP     |                                  |
| O81986        | YRMVMGSKHNET                                             | ---  | IGCALIYHTT                                  | NFTHFELKEEVLHA-VPHTGMWECVDLFPV   |
| O82119        | WRVLVGSVR                                                | ---  | NHRGKVIYKSNKFMKWTAKHPLHS-AQGTGNWECPDFFPV    |                                  |
| Q05G13        | WRTIIGSKDDD                                              | ---  | GHAGIVLSYKTTDFVNYELMPGNMHRGPDGTGMYE         | CCLDFPV                          |
| Q05JI1        | WRLTIGSKIG                                               | ---  | KTGISLVYQTTDFKTYELLDEYLHA-VPGTGMWECVDFYFP   |                                  |
| Q05JI2        | WRIAIGSRI                                                | ---  | NRTGITFVYDTKDFINYLRLGVLHG-VPNTGMWECVDFYFP   |                                  |
| Q0PCC5        | HRMIMGTRGN                                               | ---  | TGLVLVYHTTDFINYLLEDEPLHS-VPNTDMWECVDFYFP    |                                  |
| Q0PCC7        | HRMIMGTRGS                                               | ---  | TGMVLVYTTKDFTYELKDEPLHS-VANTDMWECVDFYFP     |                                  |
| Q0PCC8        | HRMIMGSKRNN                                              | ---  | TGLVLVYTTDFVNYELLDEPLHS-VPNTDMWECVDFYFP     |                                  |
| Q0PCC9        | HRMIGTRRNN                                               | ---  | TGLVLVYHTKDFINYLLEDEPLHS-VPDSGMWECVDLFPV    |                                  |
| Q0W9N0        | WRITIGSKI                                                | ---  | NKTGISLVYDTIDFKFELKGLMLHG-VPGTGMWECVDFYFP   |                                  |
| Q1KL65        | WLLTIGSKIG                                               | ---  | KTGIALVYETS                                 | NFTSFKLLDEVLHA-VPGTGMWECVDFYFP   |
| Q2UXF7        | WRIAIAAKVGGPNGIASTLIYRS-KDFRHWKRNASPLYT-SRAAGMVECPDLFPV  |      |                                             |                                  |
| Q2WEC6        | HRMIMGSKRGN                                              | ---  | TGVVLVYHTTDFVNYELLDEPLHS-VPNTDMWECVDFYFP    |                                  |

Q2XQ19 WRVVGSKD---AHHAGIAMTYKTKDFVHYELVPLGLLHR-VPATGMWECIDFYVP  
Q2XQ21 WRLLVGSVVTGGS-RGVAYVYRS-RDFRLWTRVRRPLHS-A-PTGMWECPDFYVP  
Q3L7K5 WRVIGSK---IKRKGALILYRS-KDFVRWTKAQHPLHS-GKNTGMWECPDFFPV  
Q41215 WLLTIGSKIG---KTGVALVYETS**NFT**SFKLLDGLVLA-VPGTGMWECVDFYVP  
Q41604 WKLAIGSKDE---QHNGISLIYRTYDFVSYELLPIILHA-VEGTGMWECVDFYVP  
Q41606 WKLAIGSKDE---QHNGISLIYRTYDFVSYELLPIILHA-VPGTGMWECVDFYVP  
Q42691 Q42722 WRLIIGSKL---**NKT**GISLVYDTVDFKNFTLLDGLVLA-VHGTGMWECVDFYVP  
Q43172 WRTLIGSV---WKGQGLAILYKS-KNFMKWTKIQHPLHS-VDGTGNWECPDFFPV  
Q43799 WRLVIGSV---KNHRGVILYRS-KDFMKWTKAKHPLHT-ATNTGNWECPDFFPV  
Q43818 SL**NIT**GSDLG---RGSVALYSETEFIKHGKTGVPIDA-QTNTVTSEKLDLFLV  
Q43855 WRLIIGSKT---GDTGVAYLYRS-KNFLKWIRAKHPHLS-AKRTGMWECPDFYVP  
Q43856 WRGIVGSKR---STRGIAILYKS-KDFVKWKKSKHPLHS-AKGTGMWECPDFFPV  
Q4AEI9 WRIIGSKNDT---DHSGIVFTYKTKDFVSYEMIPGYLYRGPAGTGMYEICIDLYAV  
Q547Q0 WLLTIGSKIG---KTGVALVYETS**NFT**SFKLLDGLVLA-VPGTGMWECVDFYVP  
Q575T1 WRLVIGSKD---DHHAGMVMYKTKDFIDYELVPLGLLHR-VPGTGMWECIDLYPV  
Q5ZQK6 WRVLVGSK--KN-DLGVAYLYQS-KDFVKWERFDYPLMS-MMETSTWECPDFFPV  
Q64GB3 WRIAIGAEVNGYS---AALLYKS-EDFMNWSRVGHPLYS-SSASTMWECLDFFAV  
Q6F4N3 WRTIIGSKDDD--GHAGIVLSYKTTDFVNYELMGPNGMHRGPDGTGMYEICLDFPV  
Q6KCH6 WRLVIGPKD---DRHAGMVMYKTKDFMDYELVPLGLLHR-VPGTGMWECIDLYPV  
Q6PVN1 WRTVIGSKDN--HGHTGIVMTYKTKDFINYEIPGLLHS-VPGTGMWECIDFYVP  
Q70AT7 WRMAVGGEELNGYS---AALLYKS-EDFL**NWT**KVDHPPYS-**HNGSN**MWECPDFFAA  
Q70LF5 WRTIIGSKNDS--DHSGIVFSYKTKDFVSYELMGPYMRGPKGTGEYECIDLYAV  
Q70XE6 WRVIVG---TQQGKRGLAVLFTS-DDFVK**NNT**GNPLHS-TEGNGIWECPDFFPV  
Q7DLY6 WRITIGSKI---**NRT**GISLIYDTTDFKTYEKHETLLHQ-VPNTGMWECVDFYVP  
Q7XA49 WRVLVGSKR---RTRGIAILYRS-KDFVNWVQAKHPLYS-ILGSGMWECPDFFPV  
Q7XAS5 WLLTIGSKIG---KTGIALVYETS**NFT**SFKLLGEVLA-VPGTGMWECVDFYVP  
Q7XZS5 WRIVIGSKDDAEGDHAGIADVYRTKDFVHFELLPDGLLHR-VAGTGMWECIDFYVP  
Q84LA1 WRMAVGGEELNGYS---AALLYKS-EDFL**NWT**KVDHPLYS-**HNGSN**MWECPDFFAV  
Q84RM0 WRTVIGSKDDD--GHAGIILSYKTKDFVNYELMGPNGMHRGPDGTGMYEICIDLYPV  
Q84V21 WRILIA---SMRKHGMALLYRS-RDFMKWIKAQHPLHS-STNTGNWECPDFFPV  
Q84XV1 WKLVVG---SKWNRGKAILYRS-RDFVHWKAKHPLHT-VKDTGMWECPDFYVP  
Q8GT50 WRLIG-ALSGAS-RGVAYVYRS-RDFMRWTRVRKPLHS-A-PTGMWECPDLYPV  
Q8GT63 WRIAIAARVHDVG--GATLIYRS-KDFLRWERNADPLYL-AHAAGMVECPDLFPV  
Q8GUA3 WLLTIGSKIG---KTGIAIVYGT**S****NFT**NFKLLDGLVLA-VPGTGMWECVDFYVP  
Q8GUB8 WRTVIGSKDN--NGHAGIAMVYKTKDFLNYELIPGYLHR-VDGTGMWECIDFYVP  
Q8L6W0 WQVLIG--GKID-GRGMAYLYQS-NDF**INWT**RSEKIFHS-SVKTGMWECPDFYVP  
Q8L6W1 WRLIG---SKRQGLSLLFRS-RDFVHWVQAKHPLYS-DKLSGMWECPDFFPV  
Q8L6W2 WRITIGSKI---**NKT**GISLVYDTTDFKNYELLSNHLHA-VQGTGMWECVDFYVP  
Q8L897 WRTIIGSKI---**NKT**GVALVYDTVDFKTYERKDVLLNA-VPGTGMWECVDFFPV  
Q8LPM7 WHMLIGSKDD--NHYGTVLIYLTDFKTYTLLPEILHKTNDVGMLECVDLYPV  
Q8LRN6 WRTLIGSLW---GNKGMAILYKS-RDLMKWTKVQPLHS-VDGTGNWECPDFFPV  
Q8RVH4 WRITIGSKI---**NKT**GISLVYDTEDFKTFELLDGLLHA-VPGTGMWECVDFYPI  
Q8VXS5 WRLIGSKR---QORGLSLLFRS-RDFVHWVQAKHPLYS-DKLSGMWECPDFFPV  
Q8VXS7 WRITIGSKL---**NKT**GISLVYDTTDFKNYELLSNHLHA-VQGTGMWECVDFYVP  
Q8W3M2 WRIAIGSRI---**NRT**GITFVYDTKDFINYEELRGVHLG-VPNTGMWECVDFYVP  
Q93X59 WRIVVG--GDRD-NNGMSLLYQS-TDFVNWKRYDQPLSS-AIATGTWECPDFYVP  
Q941I4 WRTIIGSKV---**NKT**GISIVYTTNFIDYELLEGLVLA-VPGTGMWECVDFYVP  
Q944C8 WRLTIGSKIG---KTGISLVYQTTDFKTYELLDEYLHA-VPGTGMWECVDFYVP  
Q944U7 WRMLVGSK---NKRRGIAHLYKS-KDFMNWVAKHPLHS-RPDTGMWECPDFFPV  
Q94C05 WLLTIGSKV---**NKT**GISLVYETT**NFT**DYKLLDGLVLA-VPGTGMWECVDFYVP  
Q94C06 WLVITIGSKV---KTGISLVYETT**NFT**TFKLLDGLVLA-VPGTGMWECVDLYPV  
Q94C07 WRAIIGSKEKE---KVGLSVYKTD**NF**SHFRPVVIMHR-VPGTGMWECVDFYVP  
Q94C08 L-ITIGSKLG---KTGISLVYETT**NFT**TFKLLYGLVLA-VPGTGMWECVDLYPV  
Q9AUH1 WRTLFGSKDDHHGHHDGIAIMYKTKDFLNYELIPGILHR-VENTGEWECIDFYVP  
Q9FNS9 WRIVIG--SEID-GHGTALLYRS-**TNGT**KWIRSKKPLHF-SKTGMWECPDFYVP  
Q9FQ62 WRTIIGSKI---**NKT**GISLVYDTIDFKTYEKHDTLLHK-VPNTGMWECVDFYVP  
Q9FR47 YRTVIGSKDDNQGDHAGFAMVYKTKDFLSFQRIPIGILHR-VEHTGMWECMDFYVP  
Q9LD97 WRILIASMR---KHGMALLYRS-RDFMKWIKAQHPLHS-STNTGNWECPDFFPV  
Q9LDS8 WRLIGSMR---KHGMALLYRS-RDFMKWIKAQHPLHS-STNTGNWECPDFFPV  
Q9M4K8 WRIVIGSMR---KHGMALLYRS-RDFIKWAKAQHPLHS-SPHTGNWECPDFFPV  
Q9SBI2 WRLLVGSAAAGSMPPRGVAYVYRS-RDFRRWRRVRRPLHS-A-PTGMWECPDFYVP  
Q9SM30 WIMIMGSKH---**NQT**IGCALVYRTS**NFT**HFELEEPLHA-VPHGTGMWECVDLYPV  
Q9SPK0 WRLLVGSAAAGSSP-RGVAYVYRS-RDFRRWRRVRRPLHS-A-PTGMWECPDFYVP  
Q9ZP42 WRLIIGSK---RNHRGLAILYRS-KDFMHWTKAKHPLYS-TPKNGMWECPDFFPV  
Q9ZR55 WRLLVGSQK--D-KTGIAFLYHS-GDFV**NWT**KSDSPLHK-VSGTGMWECVDFFPV  
Q9ZR96 HRMIMGTKINR----TGLVLVYHTTDFNTNYMLEEPLHS-VPDMDMWEVDLYPV  
Q9ZTW9 RLVTIGSKVG---KTGISLVYETT**NFT**TFKLLYGLVLA-VPGTGMWECVDLYPV  
Q9ZTX2 WLVITIGSKVG---KTGISLVYETT**NFT**TFKLLDGLVLA-VPGTGMWECVDLYPV  
P92916 YHIVVGSKNDS-LQHTGIALVYLTDFKFKFDLLPTVLSVDK-VGMWECVEVYVP  
Q5FC15 WQLVIGSKNDS-LQHTGIAMVYTTKDF**INLT**LLPGVLHSDH-VGMWECVDLFPV

P93761 WLLTIGSKVG----KTGIALVYETSN---FKLLDGVLHA-VPGTGMWECVDFYFPV  
P49175 WRVAIGSKDR---DHAGLALVYRTEDFVRYDPAPALMHA-VPGTGMWECVDFYFPV  
Q43089 WRVLIGSKI---DTKGMAILYKS-KNFVDWVEAKHPLHS-ABGTGMWECPDFYFPV  
Q39692 WKILVGSRR---KHRGIAYLYRS-RNFLKWKAKHPLHS-KDRTGMWECDFYFPV  
Q39693 WKMLVGSRR---KHRGIAYLYRS-KDFLKWERSHPHIHT-KAETGMWECPDFYFPV  
Q56UD0 WRFAISAVADGVG---ATLVYRS-ADFLRWERNAAPLHA-SRDAVMAECPDLFPV  
Q0J360 WR IAVSAEVDGVA---STLVYRS-KDFVRWERNAAPLHA-SRAAGMVECPDLFPV  
P29001 WRITIGSKL----**NKT**GIALVYDTEDFKTYELKEGLLRA-VPGTGMWECVDFFPV  
O24509 WRITIGSKL----**NKT**GIALVYDTEDFKTYELKNGHLRA-VPGTGMWECVDFFPV  
P29000 WLLTIGSKIG----KTGVALVYETS**NFT**SFKLLDGVLHA-VPGTGMWECVDFYFPV  
Q43857 WRITIGSKI----**NKT**GVALVYDTEDFKTYERKDMLLNA-VPGTGMWECVDFFPV  
P80065 WRITIGSKV----**NKT**GISLMYKTTDFITYELLDNLLHA-VPGTGMWECVDFYFPV

Conservation: 20020000000022221001101212345559272221216263481511013151312  
SS IVE IVC IVD

**TARGET** SLSGEE-----GLDTSVG-GSN---VRHVLKVSLLDTRYEYTTIGTYDEKKDRYYPDE  
Q93X60 PL**NSTN**-----GLDTS-VYGGG---VRHVMKAGFEG--HDWYTTIGTYSPRENFLPQN  
Q43866 TRFGSNG-----VETSSFGEPEI--LKHVLKISLDDTKHDYTTIGTYDRVKDKFVDPN  
A0A7Z0 SKTS-----DKGLDT--SVNGPDVKHVVKASLDDDRNDYYSLSGYEEKTKGWVDPN  
A3QRG0 GGNS-----SEMLGGDSSPGVLFVLKESDDEHHDYALGRFDAVANVWTPID  
A5GXL9 SNTGKD-----GIDTS-FQGNM---TMHVLKVSFDS--HDYVYIMGYDPMQDQFLLAT  
A7IZK7 SS-SPIG-----LDTSTIGEG----VKHVLKVSLLDTKHDQYAIPTYVHSHKDVFPNA  
A7IZK8 STTG-----DNGLDT--SANGPGTKHVHLKASLDENKHDYALGTYDPKNNKWTDD  
A7LJR5 ATAG---PLVGRALEN---SVPAGENVKHVHLKAGLNDEWHDYAIGTYDREANKWTPDD  
A7RDD3 ATTD---SRANQALD---MTTMRPGPGLKYVLKASMDDERHDYALGSFDLDSFTFTPDD  
A9CZQ1 K-----EIQGA----TKYLLKVSMDYTLHDYVMGTYDEERDIF- IKD  
A9E2W4 G-----EARGV---TKYMLKVSMDVSYDYALGTYDEEGGVF-TRD  
A9JIF3 **PLNSTN**-----GLDTS-VYGGX---VKHVMKAGFGG--HDWYTTIGTYTPDRENFLPQN  
A9LST6 STKK-----TNGLDT--SYNGPGVKHVHLKASLDDNKQDHYAIGTYDLGKNKWTDPN  
A9YTS8 STH-----TNGLEMK--DNGPDVKYILKQSGDEDRHDWYAIIGSFDPINDKWYPDD  
A9YTS9 STINDS-----ALDIA--AYGSDIKHVLIKESWEGHGMWYSIGTYDAMKDKWTPDN  
B0I1Q7 GGNS-----SEMLGGDSSPEVLFVLKESANBEWHDYAPWEVRCRRNTWTPQD  
B2NIA0 AING-----SKGLDT--SVNSGRIKHVHLKASLDDTKLDHYAIGTYFIE**NET**WVDPDD  
O04372 ATSG---AGANRGLDP---SVRPSKLVKHVHLKESDDDRQDHYAIGTYDPTNKWTPDD  
O23786 STH-----TNGLDMV--DNGPNVKHVHLKQSGDEDRHDWYALGTYDVVNDKWTPDD  
O24459 STH-----TNGLDMK--DNGPNVKYILKQSGDEDRHDWYAVGTFDPEKDKWYPDD  
O65341 ATRGKVSNGVDMSDALGKNG-AVVGDVVHVMKAGMDDDRHDYCALGRYDAAANAWTPLD  
O65342 ATRGKVSNGVDMSDALGKNG-AVVGDVVHVMKAGMDDDRHDYCALGRYDAAANAWTPLD  
O65778 STINDS-----ALDVA--AYGPGIKHVLIKESWEGHAMDFYSIGTYDAFNKDKWTPDN  
O81082 ATTG---NQIGNGLE---MKGG-SGKGIKHVHLKASMDDERHDYAIGTFDLESFSWVPDD  
O81083 ATADS--SHANHGLDP---SARPSPAVKHVHLKASMDDDRHDYAIIGTYDPAQNTWVDPDD  
O81118 AVAGGRRHH-RSGVDTRRELHDSTVAEEVKYVLKVSLDVTRYEYTTIGWYDHAKDRYTPDL  
O81985 SLTNS-----ALDMA--AYGSGIKHVLIKESWEGHGMWYSIGTYDAINDKWTPDN  
O81986 STVH-----TNGLDMV--DNGPNVKYVLKQSGDEDRHDWYAIIGSYDIVNDKWYPDD  
O82119 SLKNEN-----GLDTSYD-GKD---VKHVLKVSFDVTRFDHYTVGTYDTRKDKYFPDN  
Q05G13 GGNS-----SEMLGGDSSPEVLFVLKESANDEWHDYALGWFDAAANTWTPQD  
Q05JI1 AING-----SVGLDT--SATGPGIKHVHLKASLDDTKVDHYAIGTYNPNANDKWTPDN  
Q05JI2 STTG-----EHGLDT--SHNGPGVKHVVKASMDDDRHDYAIIGTYHEK**NVT**WVDPN  
Q0PCC5 STID-----DSALDMA--AYGSDIKHVLIKESWEGHGMWYSIGTYDAMKDKWTPDN  
Q0PCC7 SLTNS-----ALDMA--AYGSGIKHVLIKESWEGHGMWYSIGTYDAKTDKWTPDN  
Q0PCC8 SLTNS-----ALDMA--AFGSGIKHVLIKESWEGHGKDFYSIGTYDPKIDKWIIPDN  
Q0PCC9 STM**NDT**-----ALDVA--AYGSGIKHVLIKESWEGHAKDFYSIGTYDAINDKWTPDN  
Q0W9N0 SKIA-----ENGLDT--SENGPAVKHVHLKSSLDDDRNDYALGTYNAGAGKWWTPDN  
Q1KL65 STEK-----TNGLDT--SYNGPGVKHVHLKASLDDNKQDHYAIGTYDLTKNKWTPDN  
Q2UXF7 AEPGVEEGR-LGYASGPASGA-----VRHVLKLSVM**NTT**QDYAVAGRYDDVADTF-VPE  
Q2WEC6 SLTNS-----ALDIA--AYGPGIKHVLIKESWEGHAMDFYSIGTYDAITDKWTPDN  
Q2XQ19 GTRG---DNGIDMSEAMAKS--NNAEDVVHVMKASMDDDRHDYALGRYDAAANTWAPMD  
Q2XQ21 TADGR---QHGLDTSVMANDKRP--VKHVLKNSLDLRRYDYTVGTYDREAERFVDPDD  
Q3L7K5 SINSSTG-----VDTSSISKT-----LKYVLKLSLDDTKHDYTTIGSYNREKDTYVPDK  
Q41215 STKK-----TNGLDT--SYNGPGVKHVHLKASLDDNKQDHYAIGTYDLGKNKWTDPN  
Q41604 LTNS-----TVGLDTSVPPGPGVVRHVLKASLDDDKHDYAIIGTYDVVSGTWIPDD  
Q41606 LTNS-----TVGLDTSVPPGPGVVRHVLKASLDDDKHDYAIIGTYDVVSGTWIPDD  
Q42691 YKNGNTMG----IDTSVIGPN-----IKHVLKVSLLDVSKHDVYTTIGGYDTKKDAYTPDV  
Q42722 SKFG-----ENGLDT--SFDGVGVKHVVMKASLDDDRNDYAIIGTYDVPVSGKWWTPDN  
Q43172 LLHGTN-----GLDASYN-KKN---IKHALKVSLLDVTRFEYTTVGIYDTKKDRYIPDK  
Q43799 SLKHTN-----GLDTSYR-GEY---TKHVLKVSLLDVTRFEYTTVGTYDTRKDRYIPDN  
Q43818 HAPG-----ITGMWTSVECRSVVGIKNSLDTSQYNGDLVGSILTSWDKNHETN  
Q43855 SLEGN-----GLDLSMMGNM-----VKHVLKNSLDITRYEYTTIGTYLQNDKYIPDK  
Q43856 LKNGIK-----GVDTSLN-DDY--VRHVLKVSLLDKKHDDYLLIGSYDEEKDRFVDPDR  
Q4AEI9 GGRK-----ASDMY**NST**-AKDVLYVLKESDDDRNDYALGRFDAANANTWTPID



Q547Q0 STKK-----TNGLDT--SYNGPGVKHVLKASLDDNKQDHYAIGTYDLGKNKWTPDN  
Q575T1 GGLR-----GIDMTEAVAAASNNGGDVLHVMKESDDDRHDYALGRYDAAKNTWTPLD  
Q52QK6 SVSSTN-----GLDTSGVINPG-----VKHVVKVGFNG--IDWYTI GTLS-ERDNYVPEN  
Q64GB3 LPSNGGLD-L-----SAAIPKG----AKHVLKFSVDQ--CDKYMIGVYDLECDAF-VPD  
Q6F4N3 GGNs-----SEMLGGDSSPEVLFVLKESANDEWHDYALGWFDAAANTWTPQD  
Q6KCH6 GGVR-----GIDMTDAVTAASNNGGDVLHVMKESDDDRHDYALGRYDATKNTWTPLD  
Q6PVN1 GGAD-----GSEELYVMKESDDDRHDWYALGRYDAAANKYTPID  
Q70AT7 LPGNNGGLD-L-----SAAIPQG----AKHALKMSVDSV--DKYMIGVYDLQRDAF-VPD  
Q70LF5 GGGSR-----ASDMY**NST**-AEDVLYVLKESDDDRHDWYSLGRFDAAANKWTPID  
Q70XE6 Y-VGKSLG-----ADTSIIGDD-----VKHVLKLSLFDQTQYEEYTTIGRYDIEKDIYVPDE  
Q7DLY6 SKTQ-----LNGLDT--SVNGPDVKHVIKASMDDRIDHYAIGTYD**S**NATWVDPN  
Q7XA49 LNNQDL-----GVDTSVN-GYD--VRHVLKVSLLDCKHYYMIGSYNAAKDAFIPD-  
Q7XAS5 STEK-----TNGLDT--SYNGPGVKHVLKASLDDNKQDHYAIGTYDLTKNKWTPDN  
Q7XZS5 ATRGKASNGVMSDALGKNG-AVVGDVVHVMKASMDDRHDYALGRYDAAANAWTPLD  
Q84LA1 LPGNNAGLD-L-----SAAIPQG----AKHALKMSVDSV--DKYMIGVYDLQRDAF-VPD  
Q84RM0 GGNs-----SEMLGGDSSPGVLFVLKESDDEHYYALGRFDVANVWTPID  
Q84V21 L**FNSTN**-----GLDVSYR-GKN----VKYVLKNSLDVARFDYTTIGMYHTKIDRYIPNN  
Q84XV1 AVKG-----RRGLDTSAYGDG-----VKHVLKVSLLDRKYEYTTIGKYHYHQDKYVPDN  
Q8GT50 TADGRHR---HKGLDTSVVSQPR----VKHVLKNSLDLRRYDYTTVGTDRKTERYVPDN  
Q8GT63 SEPGEVVG-----LPSAGAG-----ARHVLKMSVMDTVQDYVYVGRYDAAADAF-  
Q8GUA3 STDE-----ANGLDT--SYNGPGIKHVLKASLDDDKHDYALGTYDPVKNKWTPDN  
Q8GUB8 GKG**NGS**-----EELYVLIKESDDDRHDWYTLGKYDAAANTFTAAD  
Q8L6W0 SINGKD-----GVDNY-LEKGN----TKFVLKASFLD--HDHYILGYYKAERNQFQVEA  
Q8L6W1 YANGDQMG-----VDTSIIGSH-----VKHVLKNSLDITKHDIYTTIGDYNIKKDAYPDI  
Q8L6W2 SVAE-----PNGLDT--STNDQSVKHVLKASMDDRNDYTTIGTYIED**NVT**WVDPN  
Q8L897 SKKS-----**ENGSDT**--SINGVEVKHVMKVSLLDDRHDYSLGTYDEKKVKFIADD  
Q8LPM7 ATTG---NQIGNGLE---MQVG-FGKGIKHVLKASMDDERHDYALGTFDLESFTWVDPD  
Q8LRN6 LLRGTN-----GLDASYK-GEN----IKYVLKVSLLDTRFEYTTIGTYDTPDK  
Q8RVH4 SKQG-----ENGLDT--SVDGPGVKHVKASMDDRNDYALGTYDAYKGGKWPDN  
Q8VXS5 YANGDQMG-----VDTSIIGSH-----VKHVLKNSLDIPKHDIYTTIGDYNIKKDAYPDI  
Q8VXS7 SVAE-----PNGLDT--STNGPSVKHVLKASMDDRNDYTTIGTYIED**NVT**WVDPN  
Q8W3M2 STTG-----EHGLDT--SHNGLGVKHVKASMDDRHDYALGTYHEK**NVT**WVDPN  
Q93X59 **PLNSTN**-----GLDTS-VYGGs----VRHVMKAGFEG--HDWYTI GYSPDRENFLPQN  
Q941I4 SING-----STGLET--SVNGPGVKHVLKASLDDTKMDHYAIGTYFLE**NNT**WLPDD  
Q944C8 AING-----SVGLDT--SATGPGIKHVLKASLDDTKVDH**NKT**GTYNPENDKWTPDN  
Q944U7 PKSGEN-----GLDVGIT-GRD---VRHVLKVSLLDTRFEYTTIGRYPEIDRYIPYD  
Q94C05 STIG-----AIGLDT--SANVPGIKHVLKASLDDDKHDYALGTYDP**FNNT**WTPDN  
Q94C06 STTG-----ENGLDT--SVNGLDVKHVLKASLDDDKHDYALGTYDPAKNKWTPDN  
Q94C07 STVADV--ATDEGSDSTEY--SVPGIGVKHVLKSRLLDDDKDYKALGTYFAATGTFAADD  
Q94C08 STKSVI--VITQ-ENGLDT--SVHGLGVKHVLKTSFDDDKHDYALGTYDLQADTFVPDD  
Q9AUH1 GGGGSE**NSS**-----EVLHVLKASMDDERHDYSLGTYDSAANIWTPID  
Q9FNS9 TNGDKK-----GLDTS-VQGNn----TLHVLKVSFNsR--EYVYIGTYDPIKDKFSVVT  
Q9FQ62 SKTA-----VNGLDT--SVNGPNVKHIVKASMDDRFDHYAVGTYFDS**NGT**WIPDD  
Q9FR47 GGG**DSS**-----SEVLYVIKASMNDRHDYALGRYDAAAGNTWTPLD  
Q9LD97 L**FNSTN**-----GLDVSYR-GKN----VKYVLKNSLDVARFDYTTIGMYHTKIDRYIPNN  
Q9LDS8 SL**NSTN**-----GLDVSYR-GKN----VKYVLKNSLDVARFDYTTIGMYHTKIDRYIPNN  
Q9M4K8 SLKNTN-----GLDASYR-GKN----VKYVLKNSLDVNRFEYTTIGMYDTKKDRYIPDN  
Q9SB12 SKGGAP----RAGLETsvppGPR----VKHVLKNSLDLRRYDYTTVGTYHPRAEYVPDD  
Q9SM30 STH-----TNGLDMM--DNGPNVYILKQSGDEDRHDWYALGSDPINDKWYPDD  
Q9SPK0 SKGGAP----RAGLETsvppGPR----VKHVLKNSLDLRRYDYTTVGTYHPRAEYVPDD  
Q9ZP42 SKTKLLG-----LDTSAIGPD----VKHVLKVSLLDNTRKEYTTIGTY**NVS**KDIYIPDD  
Q9ZR55 WVDSTN-----GVDTS-IINPSNR--VKHVLKLGIQDHGKDCYLI GKYSADKENYVPED  
Q9ZR96 STINDS-----ALDIA---AYGPMKHVIKESWEGHGMWYSIGTYDVINDKWTPDN  
Q9ZTW9 STTG-----ENGLDT--SVNGLGVKHVLKTSLDDDKHDYALGTYDPVKNKWTPDN  
Q9ZTX2 STTG-----ENGLDT--SVNGLDVKHVLKASLDDDKHDYALGTYDPAKNKWTPDN  
P92916 ATTG---PLLHKAIDNFDVDRVLDSTVKHVLKASMNDEWHDYALGTFDPIGNKWTPDD  
Q5FC15 ASSG---PLIGRGLD---RSMMLADNVKHVLKASMNDEWHDYALGSDVATHRWVPDD  
P93761 STLD-----ANGLDT--SYNGPGIKHVLKASLDDNKQDHYVIGTYDPVKNKFSDPN  
P49175 AAGS-----AAAGSGDLETSAAPGPGVKHVLKASLDDDKHDYALGTYDPATDTWTPDS  
Q43089 LDKNLLR-----TGVDTSRNGDDD---VRHVLKVSLLDCKHDLGYSYDVVKDVFVPEN  
Q39692 APKGMN-----GLDTSVPT-GQD---IKHVLKVSLSYSTRYEYTTVGEYDRDNDIYVPDN  
Q39693 SPRSED-----GLDNSKM-GRG----IKHVLKVS**LNST**RYEYTTIGRYNRVRDFYVPDN  
Q56UD0 AEHGEDGLD-LDASAI GGAGAG-----VRHVLKVSMPDTLEDYMYMGRYDADDTFTVPP  
Q0J360 AERGEDGLD-----TSANGAG-----VRHVLKLSVMDTLQDYMYMGTYYDAAADF-SPA  
P29001 SKKN-----GNGLDT--SVNGAEVKHVMKVSLLDDRHDYALGTYDDNKVLFTPDD  
O24509 SKKN-----ENGLDTSLSINGAEVKYVMKVSLLDDRHDYTTIGTYDENKVLFTPDD  
P29000 STKK-----TNGLDT--SYNGPGVKHVLKASLDDNKQDHYAIGTYDLGKNKWTPDN  
Q43857 SMKS-----ENGLDT--SFTGDEVKHMVKSLLDDRHDYALGTYDEKVKFIADD  
P80065 SVTG-----SNGLDT--SVNGPGVKHVLKSSLLDDRHDYALGTYDPIINDKWTPDN

Conservation: 011110203011125274912369776756103167544543274330014110578534  
SS

| TARGET | VA                                                            | VB | VC |
|--------|---------------------------------------------------------------|----|----|
| A93X60 | A-----LVDGWAGLRYDYG--NFYASKTFFDPSKNRRILWGWANESDSVQDD-MNKGWAGI |    |    |
| Q43866 | GL---SLTGSTLDRYDYG-QFYASKSFFDDAKNRRVLWAWVPETDSQADD-IEKGWAGL   |    |    |
| A0A7Z0 | G-----FKMDGTAPRYDYG-KYYASKTFFDPSKNRRILWGWITNESSVEDD-VEKGWAGI  |    |    |
| A3QRG0 | QK---IDVGIG--IRYDYG-IFYASKTFYDQNKERRVLWGWIGESDSEAD-MQKGWASV   |    |    |
| A5GXL9 | RE---LDLGIG--LRYDWG-KYYASKSFYDQKKNRRIVWAYIGETDSEQAD-ITKGWANL  |    |    |
| A7IZK7 | S----DFNVSNLQYDYG-RFYASKSFYDQKKNRRVLWGWVNEGDNPSDA-FKKGWAGL    |    |    |
| A7IZK8 | G-----AAEKFSGLRYDYG-KSYASKTFYDSLKRRILWGWINESLSREDD-IAQGWASV   |    |    |
| A7LJR5 | PE---LDVGIG--LRLDYG-KYYASKTFYDQNKRRILWGWIGETDSEAD-LMKGWASV    |    |    |
| A7RDD3 | EI---IDVGIG--LRYDWG-KFYASRTFYDPVKQRRVLWGWVGETDSREVD-IRKGWASV  |    |    |
| A9CZQ1 | ET---IDVGIG--LRYDWG-KFYASKTFYDQEKHRRVLWGWVGETDSKRDD-ALKGWASL  |    |    |
| A9E2W4 | DASSD---DCRMWPMIDYG-RLYASKTFVDEAKQRRILWAWSNETS SVADN-VAKGWAGI |    |    |
| A9JIF3 | DASST---DYRTWPMIDYG-RFYASKTFVDEAKQRRILWGWSNESNSIADD-VAKGWAGI  |    |    |
| A9LST6 | EV---DRKYYGPEVR--YG-NFYASKSFFDDAKNRRVLWGWIPESDSQEDD-IQKGWAGL  |    |    |
| A9YTS8 | PE---LDCGIG--LRLDYG-KYYASKTFYDQKKNRRVLWGWIGETDSEAD-LQKGWASV   |    |    |
| A9YTS9 | PE---NDVGIG--LRYDYG-KFYASKTFYDQKKNRRVLWGWVGETDPPKDD-LLKGWANI  |    |    |
| B01IQ7 | PE---LDVGIG--LRVDYG-RFFASKSLYDPLKRRVTVGWYVAESDSADQD-LNRGWATI  |    |    |
| B2NIA0 | PE---ADLGIG--LRYDWX-KYYASKSFYDPTKNRRIVWAYVGETDSEQAD-KAKGWASL  |    |    |
| 004372 | PT---IDVGIG--LRYDYG-RYYASKTFYDQNKDRRILLGWVNETDTETDD-LKKGWASL  |    |    |
| 023786 | ES---LDVGIG--LRYDLG-KFYASKTFYDQEKHRRVLWGWIGESDSEAD-ILKGWASL   |    |    |
| 024459 | PE---NDVGIG--LRYDFG-KFYASKTFYDQKKNRRVLWGWVGETDPPKYD-VYKGWANI  |    |    |
| 065341 | PE---NDVGIG--LRYDYG-KFYASKTFYDQKKNRRVLWGWVGETDPPKSD-LLKGWANI  |    |    |
| 065342 | AE---KDVGTG--LRYDWG-KFYASKTFYDPAKRRRVLWGWVGETDSEAD-VSKGWASL   |    |    |
| 065778 | AE---KDVGTG--LRYDWG-KFYASKTFYDPAKRRRVLWGWVGETDSEAD-VSKGWASL   |    |    |
| 081082 | PE---LDVGIG--LRCDYG-RFFASKSLYDPLKRRVTVGWYVAESDSYDQD-VSRGWATI  |    |    |
| 081083 | DT---IDVGIG--LRYDYG-KFYASKTFYDQEKHRRILWGWVGETDSKADD-ILKGWASV  |    |    |
| 081118 | AS---VDVGIG--LRYDWG-KFYASKTFYDHAKRRILLWSWIGETDSETAD-IAKGWASL  |    |    |
| 081985 | D-----FPDNDYGLRYDYG-DFYASKSFYDPPKRRVLWGWANESDTPVDD-RNKGWAGI   |    |    |
| 081986 | PE---LDVGIG--LRCDYG-RFFASKSLYDPLKRRITWGWVGESDSDQD-LSRGWATV    |    |    |
| 082119 | PE---NDVGIG--LRYDFG-KFYASKTFYDQKKNRRVLWGWVGETDPPKYD-LSKGWANI  |    |    |
| Q05G13 | T-----SIDGWKGLGLDYG-NYYASKTFFDPSKNRRILLGWANESDTPVDD-VKKGWAGV  |    |    |
| Q05JI1 | PE---ADLGIG--LRYDWG-KYYASKSFYDPIKNRRVWVAFVGETDSEQAD-KAKGWASL  |    |    |
| Q05JI2 | PE---EDVGIG--LKWDYG-RYYASKSFYDPIKRRIVWGWINETDTESDD-LEKGWASV   |    |    |
| Q0PCC5 | PE---IDVGIG--IRYDYG-LFYASKTFYDQNKRRVLWGWIGESDSEIAD-VKKGWASL   |    |    |
| Q0PCC7 | PE---LDVGIG--LRVDYG-RFFASKSLYDPLNRRVTVGWYVGESDSEAD-VNRGWATI   |    |    |
| Q0PCC8 | PE---LDVGIG--YRCDYG-RFFASKSLYDPLKRRVTVGWYVGESDSDQD-LSRGWATI   |    |    |
| Q0PCC9 | PE---LDVGIG--YRCDYG-RFFASKSLYDPLKRRVTVGWYVGESDSDQD-LSRGWATI   |    |    |
| Q0W9N0 | PE---LDLGMG--WRCDYG-RFFASKTLYDPLKRRVTVGWYVAESDSGDQD-RSRGWSNI  |    |    |
| Q1KL65 | PI---IDVGIG--LRYDYG-NFYASKSFYDQEKHRRVLWAWIKETDSEAD-ICRGWASL   |    |    |
| Q2UXF7 | PE---LDCGIG--LKLDYG-KYYASKTFYDQKKNRRVLWGWIGETDSEAD-LQKGWASV   |    |    |
| Q2WEC6 | VDVERNADDCRTWRRFDYG-HVYASKSFFDPSKNRRVLWAWANESDSDQD-IARGWSGV   |    |    |
| Q2XQ19 | PE---LDVGIG--LRCDYG-RFFASKSLYDPLKRRITWAYVAESDSDQD-LSRGWAHV    |    |    |
| Q2XQ21 | PD---ADVIGIG--LRYDWG-KFYASKTFYDPAKRRRVLWGWVGETDSEAD-VAKGWASL  |    |    |
| Q3L7K5 | P-----AGDEHH-LRYDYG-NFYASKTFYDPAKRRRILWGWANESDTAVDD-VAKGWAGI  |    |    |
| Q41215 | G-----SVDNDSGLRYDYG-KFYASKTFFDPAKRRRILWGWINESSVEHD-IEKGWASV   |    |    |
| Q41604 | PE---LDCGIG--LRLDYG-KYYASKTFYDQKKNRRVLWGWIGETDSEAD-LQKGWASV   |    |    |
| Q41606 | VE---ADVIGIG--WRYDYG-KFYASKTFFDPAKRRRVLWGWVGETDSEAD-RLKGWASV  |    |    |
| Q42691 | VE---ADVIGIG--WRYDYG-KFYASKTFFDPAKRRRVLWGWVGETDSEAD-RLKGWASV  |    |    |
| Q42722 | G-----FMNDSLRYDYG-KYYASKTFYDQKKNRRVLWGWVGETDSEAD-RLKGWASV     |    |    |
| Q43172 | PE---LDVGIG--LRYDYG-IYYASKTFYDQKKNRRVLWGWVGETDSEAD-VRKGWASV   |    |    |
| Q43799 | T-----SIDGWKGLRLDYG-NYYASKSFFDPSKNRRIMWGWANESDTPVDD-VKKGWAGI  |    |    |
| Q43818 | IL-----VDLVI SERSLYG-KQVADKSLGLRKNDEALEMIASETPSVRNF-VSNGWLEI  |    |    |
| Q43855 | T-----SEDGWGLRYDYG-NFYASKSFFDPTKNRRILWGWANESDTKEDD-VKKGWAGI   |    |    |
| Q43856 | GF---EEVEIEEVFRYDYG-KYYASKTFFDYKKNRRILLGWVNESSIPDD-IKKGWAGI   |    |    |
| Q4AEI9 | TE---QELGVA--LRYDYG-RYDASKSFYDPAKRRRVLWGWVGETDSEAD-AAKGWANL   |    |    |
| Q547Q0 | PE---LDCGIG--LRLDYG-KYYASKTFYDQKKNRRVLWGWIGETDSEAD-LQKGWASV   |    |    |
| Q575T1 | SD---ADVIGIG--LRYDWG-KFYASKTFYDPSKRRRVLWGWVGETDSEAD-VAKGWASL  |    |    |
| Q62QK6 | ----GLKGNSLDMRYDYG-KFYASKSFYDPAKRRRVLWGWVGETDSEAD-VARGWSGL    |    |    |
| Q64GB3 | IVLD---DRLLPRIDYG-NYYASKSFFDPSKNRRILWGWITNESSSDDD-VAKGWAGI    |    |    |
| Q6F4N3 | PE---ADLGIG--LRYDWG-KYYASKSFYDPIKNRRVWVAFVGETDSEQAD-KAKGWASL  |    |    |
| Q6KCH6 | VD---ADLGIG--LRYDWG-KFYASKTFYDPAKRRRVLWGWVGETDSEAD-VAKGWASL   |    |    |
| Q6PVN1 | AE---MDVGIG--LRYDWG-KFYASKTFYDPSKRRRVLWGWVGETDSEAD-VAKGWASL   |    |    |
| Q70AT7 | NVVD---DRRLWLRMDYG-TFYASKSFFDPSKRRRVLWGWVGETDSEAD-LAKGWAGL    |    |    |
| Q70LF5 | DE---LELGVG--LRYDRG-KYYASKSFYDPPKRRVWVACVGETDSEAD-ITKGWANL    |    |    |
| Q70XE6 | G-----SIESDLGLRYDYG-KFYASKSFFDDETNRRILWGWVNESSIQADD-IKKGWASV  |    |    |
| Q7DLY6 | PS---IDVGISTGLRYDYG-KYYASKTFYDQKKNRRVLWGWVGETDSEAD-VQKGWSSV   |    |    |
| Q7XA49 | ----EESNEFVLRDYDYG-KYYASKTFFDQKKNRRILLGWANESSVAAD-IKKGWAGI    |    |    |
| Q7XAS5 | PE---LDCGIG--LKLDYG-KYYASKTFYDQKKNRRVLWGWVGETDSEAD-LQKGWASV   |    |    |
| Q7XZS5 | AE---KDVGTG--LRYDWG-KFYASKTFYDPAKRRRVLWGWVGETDSEAD-FSKGWASL   |    |    |

Q84LA1 NVVD----DRRLWLRIDYG-TFYASKSFFDSNKNRRIIWGWSRETDSPSDD-LEKGWAGL  
Q84RM0 RE---LDLGIG--LRYDWG-KYYASKSFFYDQKKNRRIVWAYIGETDSEQAD-ITKGWANL  
Q84V21 N-----PIDGWKGLRIDYG-NFYASKTFYDPSRNRRIWGWSNESDVLPPDEIKKGWAGI  
Q84XV1 T-----SADDHTGLRYDYG-NFYASKTFYDPPKQRRILWGWAKESDAEDVD-VAKGWAGI  
Q8GT50 P-----AGDEHH-LRYDYG-NFYASKTFYDPPKRRILWGWANESDAVDD-VAKGWAGI  
Q8GT63 DD-----EDCRSWRRLDYG-HVYASKSFFDPARTGACSGAGPTSPTACPTT-SSGDGPVF  
Q8GUA3 PQ---LDVGIG--LRLDYG-KYYASKTFYDQKRRILWGWIGETDSEAD-LLKGWASV  
Q8GUB8 PE---NDLGIG--LRYDWG-KFYASKTFYDPAKQRRVLWGWIGETDSEAD-VAKGWASL  
Q8L6W0 T---DFMEANTDWRDYGGKFFYASKTFYDGGKRRILWAWIMEADSRAND-IKKGWSGL  
Q8L6W1 G-----YMNDSLRYDYG-KYYASKTFYDPAKRRILWGWANESSVVEDD-IKKGWSGI  
Q8L6W2 PA---IDVGIG--LRYDYG-RFYASKTFYDHEKRRILWGWITEGDSEAD-VKKGWASL  
Q8L897 FK---NDVGIG--LRYDYG-IFYASKTFYDQKKNRRIWGWIGESDSEYAD-VAKGWASV  
Q8LPM7 DT---IDVGIG--LRYDYG-KFYASKTFYDQEKRRILWGYVGEVDSKTDD-ARKGWANV  
Q8LRN6 T-----SIDGWKGLRLDYG-NFYASKSFFYDPSKNRRIWGWANESDVTVND-VKKGWAGI  
Q8RVH4 PT---LDVGIG--LRYDYG-IYYASKTFYDQKQRRVLWSWIKETDTEASD-IKKGWASL  
Q9GUS5 G-----YMNDSLRYDYG-KYYASKTFYDPAKRRILWGWANESSVVEDD-IKKGWSGI  
Q8VXS7 PA---IDVGIG--LRYDYG-RFYASKTFYDHEKRRILWGWITEGDSEAD-VKKGWASL  
Q8W3M2 PE---IDVGIG--IRYDYG-LFYASKTFYDQKKNRRIWGWIGESDSEIAD-VKKGWASL  
Q93X59 GL---SLTGSTLDRYNYG-QFYASKSFFDDAKNRRVLWAWVPETDAPEDD-IEKGWAGL  
Q941I4 PK---IDVGIG--LKYDYG-RYYASKTFYDQKERRILLGWINETYTETDD-LEKGWSSL  
Q944C8 PE---EDVGIG--LKWYDYG-RYYASKSFFYDPPKRRIVWGWINETDTESSD-LEKGWASV  
Q944U7 T-----LVDGWAGLRPDYG-NFYASKSFFDPKTNRRILWGWANESDSRQDD-VDKGWAGI  
Q94C05 PE---IDVGIG--LRIDYG-KYYASKTFYDQKGRILWGWIGETDSEAD-LMKGWASV  
Q94C06 TD---LDVGIG--LRLDYG-KYYASKTFYDQKQRRILWGWIGETDLEAVD-LMKGWASL  
Q94C07 AD---LDVGIG--LRLDYG-KCYAARTFYDQKQRRILWGWIGETELEAVD-LMKGWASL  
Q94C08 PD---LDVGIG--LRLDYG-KYYAARTFYDQKQRRILWGWIGETDLEAVD-PMKGWASL  
Q9AUH1 PE---LDLGIG--LRYDWG-KFYASTSFFYDPAKRRVLWGWYGEVDSKRAD-VVKGWASI  
Q9MNS9 N-----DFMVSNTQFYDYG-RYYASKSFFYDPSVNRRIWGWVNEGDSSEDA-VKKGWSGL  
Q9FQ62 PT---IDVGMSASLRYDYG-KFYASKTFYDQKGRILWWSWIGESDSEAD-VQKGWSSL  
Q9FR47 PE---LDLGMG--LRYDWG-KFYASTSFFYDPIKRRRVLVGYVGETDSRRSD-EAKGWASI  
Q9LD97 N-----SIDGWKGLRIDYG-NFYASKTFYDPSRNRRIWGWSNESDVLPPDEIKKGWAGI  
Q9LDS8 N-----SIDGWKGLRIDYG-NFYASKTFYDPSRNRRIWGWSNESDVLPPDDIKKGWAGI  
Q9M4K8 N-----SIDGSKGLRLDYG-NFYASKSFFYDPMKNRRIWGWWTNESDVLPPDEIKKGWAGI  
Q9SBI2 P-----AGDEHR-LRYDYG-NFYASKTFYDPAKRRILWGWANESD'TAADD-VAKGWAGI  
Q9SM30 PE---NDVGIG--LRYDYG-KFYASKTFYDQKHSRRVLWGWYGETDPPKDD-LLKGWANM  
Q9SPK0 P-----AGDEHR-LRYDYG-NFYASKTFYDPAKRRILWGWANESD'TAADD-VAKGWAGI  
Q9ZP42 G-----SIESDSGLRYDYG-KFYASKTFYDPAKRRILWGWINESSVSGD-IKKGWSGL  
Q9ZR55 EL---TLS---TLRLDYG-MYASKSFFYDPPKRRIMTAWVNESDSEADV-IARGWSGV  
Q9ZR96 PE---LDVGIG--LRVDYG-RFFASKSLYDPLKRRRVTWGYVAESDSADQD-LNRGWATI  
Q9ZTW9 PD---LDVGIG--LRLDYG-KYYAARTFYDQKQRRILWGWIGETDLEAVD-LMKGWASL  
Q9ZTX2 TD---LDVGIG--LRLDYG-KYYASKTFYDQKQRRILWGWIGETDLEAVD-LMKGWASL  
P92916 ET---VDVGIG--LRYDWG-KFYASKTFYDPLKQRRILWGYVGEVDSQKAD-IAKGWASL  
Q5FC15 ES---VDVGIG--MRIDYG-KFYASRTFYDPPKERRVMGWYVGETDSGDAD-VAKGWASF  
P93761 PD---LDCGIG--LRLDYG-RYYASKTFYDPPKQRRVLWGWIGETDSEAD-LQKGWASV  
P49175 AE---DDVGIG--LRYDYG-KYYASKTFYDPPKRRVLWGWVGETDSEAD-ILKGWASV  
Q43089 G-----FEDNGFVLRDYG-KYYASKTFYDPPKRRILWGWANESSVADD-VKKGWSGI  
Q39692 T-----SVDGWAGLRDYG-NFYASKTFYDPPKQRRILWGWANESDSKQDD-VQKGWAGI  
Q39693 T-----SVDGWAGLRDYG-NFYASKTFYDPIKRRILWGWANESDSQIDD-VQKGWAGI  
Q56UD0 EDLEAHGDDYRWRRIDHG-HLYASKTFYDAGKRRVLWAWVNESDSEADD-VTKGWSGL  
Q0J360 EP---ERGDCCRSWRRLDYG-HVYASKSFFDVRKNRRIWAWANESDSQADD-VARGWSGV  
P29001 VK---NDVGIG--LRYDYG-IFYASKTFYDQKDRILWGWIGESDSEYAD-VTKGWASV  
O24509 VK---NDVGIG--LRYDYG-IFYASKTFYDQKDRILWGWIGESDSEYAD-VTKGWASV  
P29000 PE---LDCGIG--LRLDYG-KYYASKTFYDPPKERRVLWGWIGETDSEAD-LQKGWASV  
Q43857 FE---NDVGIG--LRYDYG-IFYASKTFYDQKDRILWGWIGESDSEYAD-VAKGWASV  
P80065 PE---LDVGIG--LRLDYG-KYYASKTFYDQKERRILWGWIGETDSEAD-LLKGWASV

Conservation: 0111102030111252749123  
SS VC VD

**TARGET** QLIPRRVWLD-PSGKQLLQWPV  
Q93X60 QSFPRALWID-RNGKQLIQWPV  
Q43866 QTIPRKIWLDRSGKQLIQWPV  
A0A7Z0 QGIPRTVLFDKKTGSNLIQWPV  
A3QRG0 MTIPRTVELDRKTRTNLIQWPV  
A5GXL9 QSFPRSVWLS-DTRKQLVQWPV  
A7IZK7 QAIPRLVWLD-KSGKQLVQWPI  
A7IZK8 QTIPRTVVFDKKTGTNLIQWPV  
A7LJR5 EGLARTVLFDEKGTNLLTWPV  
A7RDD3 QNIPRTILFDTKTKSNLILWPV  
A9CZQ1 QTVPRVLSVD-TDGKRLIQWPI  
A9E2W4 QTVPRVLSLD-TDGKRLVQWPI

|        |                                     |
|--------|-------------------------------------|
| A9JIF3 | QSFPRALWID-RSGMQLIQWPV              |
| A9LST6 | QSIPRTVLYDKKTGTHLLQWPV              |
| A9YTS8 | LNIPRSIVLDTQTGTNLIQWPI              |
| A9YTS9 | YNVARTVVLDLDRKTGTHLLHWPV            |
| B0I1Q7 | MSIPRTVELDKKTRTNLIQWPV              |
| B2NIA0 | HTIPRTVLFDSKTGTNLLQWPV              |
| 004372 | QGIPRTVLYDLRTGSNLIQWPI              |
| 023786 | LNIPRTIVLDTKTNTNLIQWPI              |
| 024459 | LNIPRSVVLDLDTGTNLIQWPI              |
| 065341 | QGIPRTVLLDTKTGSNLLQWPV              |
| 065342 | QGIPRTVLLDTKTGSNLLQWPV              |
| 065778 | YNVARTIVLDRKTGTHLLQWPV              |
| 081082 | QNIARTILFDAQTRSNLLVWPV              |
| 081083 | QGVPRTVLLDVKTGSNLIQWPI              |
| 081118 | QAIPRKIFLS-RSGRQLIQWPV              |
| 081985 | YNVGRIVLDRKTGTHLLHWPV               |
| 081986 | LNIPRTVVLDLETKTNLIQWPI              |
| 082119 | HPIPRKIWLD-PSGKQLVQWPV              |
| Q05G13 | MSIPRTVELDKKTRTNLIQWPV              |
| Q05JI1 | QTIPRTVLYD <del>NK</del> TGSNVVQWPV |
| Q05JI2 | QGIPRTVALDTKTGSNLLQWPV              |
| Q0PCC5 | YNVARTVVLDLDRKTGTHLLHWPV            |
| Q0PCC7 | YNVGRIVLDRKTGTHLLHWPV               |
| Q0PCC8 | YNVARTVVLDLDRKTGTHLLHWPV            |
| Q0PCC9 | YNVARTVMLDRKTGTNLLQWPV              |
| Q0W9N0 | QPIPRTIQYDKKTGSNLIQWPI              |
| Q1KL65 | QSIPRTVLYDKKTGTHLLQWPV              |
| Q2UXF7 | QTVPRKVWLD-EDGKQVRQWPI              |
| Q2WEC6 | YNVGRIVLDRKTGTHLLHWPV               |
| Q2XQ19 | QSIPRTVVLDLDTKTGSNLLQWPV            |
| Q2XQ21 | QAIPRKVWLD-PSGKQLVQWPI              |
| Q3L7K5 | QAIPRNWLD-KSGKQLLQWPI               |
| Q41215 | QSIPRTVLYDKKTGTHLLQWPV              |
| Q41604 | LPIPRTILFDQKTGSNLLLWPV              |
| Q41606 | LPIPRTILFDQKTGSNLLLWPV              |
| Q42691 | HTIPRTIWLD-KSGNQLIQWPI              |
| Q42722 | QGIPRTILFDPKTGSNLLQWPV              |
| Q43172 | QTIPRKLWLD-PSGKQLVQWPV              |
| Q43799 | HPIPRKLWLD-PSGKQLVQWPV              |
| Q43818 | Q-LDGNLSLTVTERGKNRDGSVL             |
| Q43855 | QAIPRTVWLD-SSRRQLRQWPV              |
| Q43856 | HTIPRTIWLH-ESGKQLVQWPV              |
| Q4AEI9 | QSIPRTVELDEKTRTNLIQWPV              |
| Q547Q0 | QSIPRTVLYDKKTGTHLLQWPV              |
| Q575T1 | QSIPRTVVLDLDTKTGSNLLQWPV            |
| Q5ZQK6 | QAVPRSVWLD-RNGKQLVQWPV              |
| Q64GB3 | YGIPRTIWLD-RDGKQLLQWPV              |
| Q6F4N3 | MSIPRTVELDKKTRTNLIQWPV              |
| Q6KCH6 | QSTPRAVVLDLDTKTGSNLLQWPV            |
| Q6PVN1 | QSIPRTVELDEKTRTNLIQWPV              |
| Q70AT7 | HTIPRTIWLA-ADGKQLLQWPV              |
| Q70LF5 | QSIPRTVELDEKTRTNLIQWPV              |
| Q70XE6 | QAIPRTVVLD-KSGKQLVQWPL              |
| Q7DLY6 | QGIPRTVVLDTRTHKNLVQWPV              |
| Q7XA49 | HTIPRALWLH-KSGKQLVQWPV              |
| Q7XAS5 | QSIPRTVLYDKKTGTHLLQWPV              |
| Q7XZS5 | QGIPRTVLLDTKTGSNLLHWPV              |
| Q84LA1 | HTIPRTIWLA-GDGKQLLQWPV              |
| Q84RM0 | MTIPRTVELDRKTGTNLIQWPV              |
| Q84V21 | QGIPRQVRLN-LSGKQLLQWPI              |
| Q84XV1 | QAIPRTIWLD-SSGRQLIQWPI              |
| Q8GT50 | QAIPRKVWLD-PSGRQLMQWPV              |
| Q8GT63 | KLFPRKIWLD-EDGKQLRQWPV              |
| Q8GUA3 | QSIPRTVLYDKETRTHVLQWPV              |
| Q8GUB8 | MSIPRTVELDEKTRTNLIQWPV              |
| Q8L6W0 | QSIPRVVWLS-ASGNQLMQWPV              |
| Q8L6W1 | HTIPRKIWLD-KLGKQLIQWPI              |
| Q8L6W2 | QGIPRTVLFQKTGTNLIQWPV               |
| Q8L897 | QSIPRIVKLDKKTGSNLLQWPV              |
| Q8LPM7 | LNARTILFDVKTRSNLLVWPV               |
| Q8LRN6 | QTIPRKIWLD-SSGKQLVQWPV              |

|        |                                      |
|--------|--------------------------------------|
| Q8RVH4 | MGPVRTIVLDKKTQSNI IQWPV              |
| Q8VXS5 | HTIPRKIWLD-KLGKQLIQWPI               |
| Q8VXS7 | QGIPRTVLFQDKTRTNLVQWPV               |
| Q8W3M2 | QGIPRTVALDTKTGSNLLQWPV               |
| Q93X59 | QSFPRALWID-RSGKQLIQWPI               |
| Q941I4 | QTIPRTVLFDA <del>TA</del> GTQLLQWPV  |
| Q944C8 | Q-----                               |
| Q944U7 | QTIPRKVWLD-PSGKQLRLWPV               |
| Q94C05 | QTIPRTVVLDTKTYTHLLQWPV               |
| Q94C06 | QAIPRTIVFDKKTGTNVLQWPV               |
| Q94C07 | QAIPRTMVFDEKTGTNVLQRPE               |
| Q94C08 | QAIPRSIVFDKKTGTNVLQRPE               |
| Q9AUH1 | QSVPTIALDEKTRTNLLLWPV                |
| Q9FNS9 | QSFPRSIWLS-NNRKQLVQWPV               |
| Q9FQ62 | QGIPRTVVLDTKTGKNLVQWPV               |
| Q9FR47 | QSIPRTVALDKKTWTNLLLWPV               |
| Q9LD97 | QGIPRQVWLN-L <del>LS</del> GKQLLQWPI |
| Q9LDS8 | QGIPRQVWLD-LSGKQLVQWPI               |
| Q9M4K8 | QAIPRKVWLD-PSGKQLIQWPI               |
| Q9SBI2 | QAIPRTVWLD-PSGKQLLQWPI               |
| Q9SM30 | LNIPRTIVLDTVTGTNLIQWPI               |
| Q9SPK0 | QAIPRTVWLD-PSGKQLLQWPI               |
| Q9ZP42 | QAIPRTIVLD-KSRKQLVQWPV               |
| Q9ZR55 | QSFPRSLWLD-KNQKQLLQWPI               |
| Q9ZR96 | YNVARTIVLDRKTGTHLLHWPV               |
| Q9ZTW9 | QAIPRTIVFDKKTGTNVLQRPE               |
| Q9ZTX2 | QAIPRTIVFDKKTGTNVLQWPV               |
| P92916 | QGIPRSVLYDVKTGTNVLTPWI               |
| Q5FC15 | QGIPRTVLFQDKKTGTNVLTPWI              |
| P93761 | QSIPRTVLFQDKKTGTNVLQWPV              |
| P49175 | QSIPRTVLLDTKTGSNLLQWPV               |
| Q43089 | HTIPREIWLH-ESGKQLVQWPV               |
| Q39692 | QLIPRKLWLD-PNGKQLIQWPI               |
| Q39693 | QLIPRRIWLD-PSGRQLVQWPI               |
| Q56UD0 | QSFPRAVWLD-EGGRQLVQWPV               |
| Q0J360 | QTFPRKMWLA-KDGKQLLQWPI               |
| P29001 | QSIPRTVRLDTKTGSNLLQWPV               |
| O24509 | QSIPRTVRLDKKTGSNLLQWPV               |
| P29000 | QSIPRTVLYDKKTGTHLLQWPV               |
| Q43857 | QSIPRIVKLDKKTGSNLLQWPV               |
| P80065 | QSIPRTVVFQDKKTGTNLIQWPV              |
