# Supplementary material for: Integrating Bioinformatics Tools to Handle Glycosylation
Source: PubMed Central journal article supplement (PMC3248387; doi:10.1371/journal.pcbi.1002285), 2011-12-29
Supplement: pcbi.1002285.s003.pdf [file pcbi.1002285.s003.pdf]

Template MTKEVCSNIGLWL-LLTLLIGNYVVN---LEASHHVYKRLTQSTNTKSPSVNQPYRTGFH  
Target MDKLLGTALLKFLPVLPLFALLFVLSNNGVEASHKIYLRYSLSVDK---VKQIHRGTGYH  
\* \* : : : : \* : \* . \* : : \* . : \* \* \* \* : \* \* . : \* \* \* \* : \* \* : \*

Template FQPPKNWMNDPNGPMIYKGIYHLFYQWNPKGAVWGNIVWAHSTSTDLINWDPHPPIAFPS  
Target FQPPKNWINDPNGPLYKGLYHLFYQYNPKGAVWGNITWAHSVSKDLINWESLEPAIYPS  
\* \* \* \* \* : \* \* \* \* \* : \* \* \* \* \* : \* \* \* \* \* : \* \* \* \* \* . \* \* \* \* . \* \* \* \* \* : . \* \* \* \* : \*

Template APFDINGCWSGSATILPNGKPVILYTG-IDPKNQQVQNIAPKNLSDPYLREWKKSPLN  
Target KWFDNYGCWSGSATILNGEPIVIFYTGIVDGNRQIQNYAVPANSSDPYLREWVKPDDNP  
\* \* \* \* \* : \* \* \* \* \* : \* \* \* \* \* : \* \* \* \* \* : \* \* \* \* \* . \* \* \* \* . \* \* \* \* \* : \*

Template LMAPDAVNGINASSFRDPTTAWLGQDKKRWVIIIGSKIHRRLAITYTSKDFLKWEKSPEP  
Target IVYDPDS--VNASAFRDPTTAWR-VGGHWRILIGSKKRDGIAYLYRSLDFKKWFKAKHP  
: : \* \* . : \* \* \* \* \* : \* \* \* \* \* : \* \* \* \* \* : \* \* \* \* \* : \* \* \* \* \* : \* \* \* \* \* : \*

Template LHYYDDGSGMWECPDFFPVTRFGSNGVETSSFGEPNEILKHVVKISLDDTKHDYTYTIGTYD  
Target LHSVQGTGMWECPDFFPVLSLSEGLDTS-VGGSN--VRHVLKVSLLDTRYEYTYTIGTYD  
\* \* : \* : \* \* \* \* \* \* \* : \* . : \* : \* \* . \* . \* : \* \* \* \* \* : \* \* \* \* \* : \* \* \* \* \* : \*

Template RVKDKFVPDNGFKMDGTAPRYDYGKYASKTFFDSAKNRRILWGWTNNESSVEDDVEKGW  
Target EKKDRYYPDEALVDGWAGLRYDYGNFYASKTFFDPSKNRRILWGWANESDSVQQDMNKGW  
. \* \* : \* \* : \* . : . \* \* \* \* \* : \* \* \* \* \* : \* \* \* \* \* : \* \* \* \* \* : \* \* \* \* \* : \*

Template SGIQTIPRKIWLDRSGKQLIQWPVREVERLRTKQVKNLNRNKVLKSGSRLEVYGVTAQAQAD  
Target AGIQLIPRRVWLDPSGKQLLQWPVAELEKLRSHNVQ-LRNQKLYQGYHVEVKGITAAQAD  
: \* \* \* \* \* : \* \* \* \* \* : \* \* \* \* \* : \* \* \* \* \* : \* \* \* \* \* : \* \* \* \* \* : \* \* \* \* \* : \*

Template VEVLFKVRDLEKADVIEPSWT--DPQLICSKMNVSVKSGLGPFGLMVLASKNLEEYTSVY  
Target VDVTFSPSLDKAEPFDPKWAALDALDVCAQKGSKAQGLGPFGLLTLASEKLEEFTPVF  
\* : \* \* . . . \* : \* \* : \* \* : \* . : \* : \* . . . : \* \* \* \* \* : \* \* \* \* \* : \* \* \* \* \* : \*

Template FRIFKARQNSNKYVVLMSDQSRSSLKEDNDKTTYGAFVDIN-PHQPLSLRALIDHSVVE  
Target FRVFKA---ADKHKVLLCSDARSSSLGEGLYKPPFAGFVDVLDLTKKLTLSLIDHSVVE  
\* \* : \* \* \* : \* : \* \* \* \* \* \* \* \* \* . \* . . . \* \* \* : \* . : \* \* \* \* \* : \*

Template SFGGKGRACITSRVYPKLAIGKSSHLFAFNYYGYSVDVNLNLAWSMNSAQIS-----  
Target SFGAGGRVITSRVYPIIAVFKAHLFVFNNGSETVTVESLDAWSMKMPVMNVPVKS  
\* \* \* . \* \* : \* \* \* \* \* : \* : \* . : \* \* \* . \* \* \* : \* \* \* . \* \* \* \* \* : \* . : \*
